# Supplementary material
Source: ML conference proceedings conference paper supplement (https://openreview.net/forum?id=Oeb0I3JcVc)
Supplement: supplementary_material [file attachment]

# GEOMETRY-AWARE APPROACHES FOR BALANCING PERFORMANCE AND THEORETICAL GUARANTEES IN LINEAR BANDITS

Anonymous authors  
Paper under double-blind review

## ABSTRACT

This paper is motivated by recent research in the  $d$ -dimensional stochastic linear bandit literature, which has revealed an unsettling discrepancy: algorithms like Thompson sampling and Greedy demonstrate promising empirical performance, yet this contrasts with their pessimistic theoretical regret bounds. The challenge arises from the fact that while these algorithms may perform poorly in certain problem instances, they generally excel in typical instances. To address this, we propose a new data-driven technique that tracks the geometric properties of the uncertainty ellipsoid around the main problem parameter. This methodology enables us to formulate a data-driven frequentist regret bound, which incorporates the geometric information, for a broad class of base algorithms, including Greedy, OFUL, and Thompson sampling. This result allows us to identify and “course-correct” problem instances in which the base algorithms perform poorly. The course-corrected algorithms achieve the minimax optimal regret of order  $\tilde{\mathcal{O}}(d\sqrt{T})$  for a  $T$ -period decision-making scenario, effectively maintaining the desirable attributes of the base algorithms, including their empirical efficacy. We present simulation results to validate our findings using synthetic and real data.

## 1 INTRODUCTION

Multi-armed bandits (MABs) have garnered significant attention as they provide well-defined framework and techniques for investigating the trade off between experimentation (learning) and rewards (earning) and in sequential decision-making problems. In MAB problems, a decision-maker sequentially selects actions from a given set and observes corresponding uncertain rewards. The MAB setting also extends to scenarios where the decision rewards can be personalized by the presence of features or covariates, leading to contextual bandits, as showcased in a large number of recent applications (Langford & Zhang, 2008; Li et al., 2010; Tewari & Murphy, 2017; Zhou et al., 2020; Villar et al., 2015; Bastani & Bayati, 2020; Cohen et al., 2020). This paper focuses on a well-studied class of models that captures both MABs and contextual bandits as special cases while being amenable to theoretical analysis: the stochastic linear bandit (LB) problem. In this model, the problem parameter  $\theta^*$  represents an unknown vector in  $\mathbb{R}^d$ , while the actions, also vectors in  $\mathbb{R}^d$ , yield noisy rewards with a mean equal to the inner product of  $\theta^*$  and the chosen action. The objective of a policy is to maximize the cumulative reward based on the observed data up to the decision time. The policy’s performance is measured by the cumulative regret, which quantifies the difference between the total expected rewards achieved by the policy and the maximum achievable expected reward.

Achieving this objective necessitates striking a balance between exploration and exploitation. In the context of LB, this entails selecting actions that aid in estimating the true parameter  $\theta^*$  accurately while obtaining optimal rewards. Various algorithms based on the *optimism principle* have been developed to address this challenge, wherein the optimal action is chosen based on the upper confidence bound (UCB) (Lai & Robbins, 1985; Auer,

2002; Dani et al., 2008; Rusmevichientong & Tsitsiklis, 2010). Another popular strategy is Thompson sampling (TS), a Bayesian heuristic introduced by Thompson (1933) that employs randomization to select actions according to the posterior distribution of reward functions. Additionally, the Greedy policy that selects the myopically best action is shown to be effective in contextual bandits (Kannan et al., 2018; Raghavan et al., 2018; Hao et al., 2020; Bastani et al., 2021).

In the linear bandit setting, two types of regret are considered. The Bayesian regret is applicable when the parameter  $\theta^*$  is treated as a random variable with a prior distribution. In this case, the regret is averaged over three sources of randomness: the observation noise, the randomized algorithm, and the random parameter  $\theta^*$ . Intuitively, the Bayesian regret measures the expected performance of the algorithm over different realizations of the parameter  $\theta^*$ . Russo & Van Roy (2014) and Dong & Van Roy (2018) establish an  $\tilde{O}(d\sqrt{T})$  upper bound for the Bayesian regret of the Thompson Sampling (TS) heuristic, referred to as LinTS, which matches the minimax optimal bound shown by Dani et al. (2008). Here,  $\tilde{O}$  refers to the asymptotic order, up to polylogarithmic factors.

On the other hand, the frequentist regret assumes a fixed, unknown parameter  $\theta^*$ , and the expectation is taken only with respect to the randomness of the noise and the algorithm. In this frequentist setting, the optimism-based algorithm proposed by Abbasi-Yadkori et al. (2011), known as Optimism in the Face of Uncertainty Linear Bandit Algorithm (OFUL), achieves a  $\tilde{O}(d\sqrt{T})$  frequentist regret bound, which matches the minimax optimal Bayesian bound. However, for a frequentist variant of LinTS, referred to as TS-Freq, which modifies the posterior distribution by increasing its variance, Agrawal & Goyal (2013) and Abeille et al. (2017) provide a  $\tilde{O}(d\sqrt{dT})$  upper bound for the frequentist regret. This regret bound falls short of the optimal rate by a factor of  $\sqrt{d}$ . Recent work by Hamidi & Bayati (2020a) confirms that this modification is necessary, and thus, the frequentist regret of LinTS cannot be improved. For the Greedy algorithm in linear bandit problems, no general theoretical guarantee exists (Lattimore & Szepesvari, 2017), and hence both LinTS and Greedy might perform suboptimally.

Despite the theoretical gaps in performance, LinTS has shown strong empirical performance (Russo et al., 2018), indicating that the inflation of the posterior distribution may be unnecessary in most problem instances, and unfavorable instances are unlikely to occur frequently. Similarly, the Greedy algorithm works well in typical instances (Bietti et al., 2021). Additionally, while optimism-based algorithms are computationally expensive (generally NP-hard as discussed by Dani et al. (2008); Russo & Van Roy (2014); Agrawal (2019)), LinTS and Greedy are known for their computational efficiency. This unsettling disparity between theoretical, computational, and empirical performance has motivated our investigation into the following two questions: Is it possible to identify, in a data-driven fashion, problematic instances where LinTS and Greedy could potentially fail and apply a “course-correction” to ensure competitive frequentist regret bounds? And can this be achieved without compromising their impressive empirical performance and computational efficiency? In this paper, we provide positive answers to both questions. Specifically, we make the following *contributions*.

1. We develop a real-time geometric analysis technique for the  $d$ -dimensional confidence ellipsoid surrounding  $\theta^*$ . This method is crucial for maximizing the use of historical data, advancing beyond methods that capture only limited information from the confidence ellipsoid, such as a single numerical value. Consequently, this facilitates a more precise “course-correction”.
2. We introduce a comprehensive family of algorithms, termed *POFUL* (encompassing OFUL, LinTS, TS-Freq, and Greedy as specific instances), and derive a general, data-driven frequentist regret bound for them. This bound is efficiently computable using data observed from previous decision epochs.
3. We introduce course-corrected variants of LinTS and Greedy that achieve minimax optimal frequentist regret. These adaptations maintain most of the desirable characteristics of the original algorithms.

The distinguishing feature of our study from the existing literature is the geometric analysis of the  $d$ -dimensional confidence ellipsoid. Specifically, we conduct an analysis considering the size, shape, position, and orientation of the confidence ellipsoid during the execution of bandit algorithms. This enables real-time characterization of the set of potentially optimal actions, leading to the establishment of a data-driven regret bound.

## 1.1 OTHER RELATED LITERATURE

Our work is closely related to three main research streams: methodological foundations of linear bandits, bandit algorithms utilizing spectral properties, and data-driven exploration techniques. While these works share some similarities with our approach, we highlight the key differences and the unique aspects of our methodology.

From a methodological perspective, our regret analysis builds upon the foundations laid by Abbasi-Yadkori et al. (2011), Agrawal & Goyal (2013), and Abeille et al. (2017). However, a key distinguishing factor is that our approach does not rely on optimistic samples, which is a departure from previous methods. This means that the algorithms we study do not always choose actions that are expected to perform better than the true optimal action. By allowing non-optimistic samples, we avoid the need to inflate the posterior distribution, a requirement in the works of Agrawal & Goyal (2013) and Abeille et al. (2017).

Our use of spectral information in bandit algorithms bears some resemblance to the study of *Spectral Bandits* (Valko et al., 2014; Kocák et al., 2014; Kocák et al., 2020; Kocák & Garivier, 2020). These works represent arm rewards as smooth functions on a graph, leveraging low-rank structures to improve algorithmic performance and obtain regret guarantees independent of the number of actions. In contrast, our approach exploits the spectral properties of the action covariance matrix, which is distinct from graph spectral analysis. Moreover, our research tackles the broader context of stochastic linear bandits without assuming any low-rank structure.

Our work also shares conceptual similarities with research on exploration strategies (Russo & Van Roy, 2016; Kirschner & Krause, 2018) and data-driven exploration reduction (Bastani et al., 2021; Pacchiano et al., 2020; Hamidi & Bayati, 2020a;b). However, our methodology and data utilization differ significantly. For instance, Bastani et al. (2021) focuses on the minimum eigenvalue of the covariance matrix, a single-parameter summary of the observed data, while Hamidi & Bayati (2020b) uses information from one-dimensional reward confidence intervals. The work of Hamidi & Bayati (2020a) is more closely related to ours, as it employs spectral information to improve the performance of Thompson Sampling in linear bandits. They use a single summary statistic called the *thinness coefficient* to decide whether to inflate the posterior. In contrast, our approach leverages the full geometric details of the  $d$ -dimensional confidence ellipsoid, harnessing richer geometric information.

## 2 SETUP AND PRELIMINARIES

**Notations.** We use  $\|\cdot\|$  to denote the Euclidean 2-norm. For a symmetric positive definite matrix  $A$  and a vector  $x$  of proper dimension, we let  $\|x\|_A := \sqrt{x^\top A x}$  be the weighted 2-norm (or the  $A$ -norm). We let  $\langle \cdot, \cdot \rangle$  denote the inner product in Euclidean space such that  $\langle x, y \rangle = x^\top y$ . For a  $d$ -dimensional matrix  $V$ , we let  $\lambda_1(V) \geq \lambda_2(V) \geq \dots \geq \lambda_d(V)$  be the eigenvalues of  $V$  arranged in decreasing order. We let  $\mathcal{B}_d$  denote the unit ball in  $\mathbb{R}^d$ , and  $\mathcal{S}_{d-1} = \{x \in \mathbb{R}^d : \|x\| = 1\}$  denote the unit hypersphere in  $\mathbb{R}^d$ . For an integer  $N \geq 1$ , we let  $[N]$  denote the set  $\{1, 2, \dots, N\}$ . We use the  $\mathcal{O}(\cdot)$  notation to suppress problem-dependent constants, and the  $\tilde{\mathcal{O}}(\cdot)$  notation further suppresses polylog factors.

**Problem formulation and assumptions.** We consider the stochastic linear bandit problem. Let  $\theta^* \in \mathbb{R}^d$  be a fixed but unknown parameter. At each time  $t \in [T]$ , a policy  $\pi$  selects action  $x_t$  from a set of action  $\mathcal{X}_t \subset \mathbb{R}^d$  according to the past observations and receives a reward  $r_t = \langle x_t, \theta^* \rangle + \varepsilon_t$ , where  $\varepsilon_t$  is mean-zero noise with a distribution specified in Assumption 3 below. We measure the performance of  $\pi$  with the cumulative expected regret  $\mathcal{R}(T) = \sum_{t=1}^T \langle x_t^*, \theta^* \rangle - \langle x_t, \theta^* \rangle$ , where  $x_t^*$  is the best action at time  $t$ , i.e.,

$x_t^* = \arg \max_{x \in \mathcal{X}_t} \langle x, \theta^* \rangle$ . Let  $\mathcal{F}_t$  be a  $\sigma$ -algebra generated by the history  $(x_1, r_1, \dots, x_t, r_t)$  and the prior knowledge,  $\mathcal{F}_0$ . Therefore,  $\{\mathcal{F}_t\}_{t \geq 0}$  forms a filtration such that each  $\mathcal{F}_t$  encodes all the information up to the end of period  $t$ .

We make the following assumptions that are standard in the relevant literature.

**Assumption 1** (Bounded parameter). *The unknown parameter  $\theta^*$  is bounded as  $\|\theta^*\| \leq S$ , where  $S > 0$  is known.*

**Assumption 2** (Bounded action sets). *The action sets  $\{\mathcal{X}_t\}$  are uniformly bounded and closed subsets of  $\mathbb{R}^d$ , such that  $\|x\| \leq X_t$  for all  $x \in \mathcal{X}_t$  and all  $t \in [T]$ , where  $X_t$ 's are known and  $\sup_{t \geq 1} \{X_t\} < \infty$ .*

**Assumption 3** (Subgaussian reward noise). *The noise sequence  $\{\varepsilon_t\}_{t \geq 1}$  is conditionally mean-zero and  $R$ -subgaussian, where  $R$  is known. Formally, for all real valued  $\lambda$ ,  $\mathbb{E}[e^{\lambda \varepsilon_t} | \mathcal{F}_t] \leq \exp(\lambda^2 R^2 / 2)$ . This condition implies that  $\mathbb{E}[\varepsilon_t | \mathcal{F}_t] = 0$  for all  $t \geq 1$ .*

## 2.1 REGULARIZED LEAST SQUARE AND CONFIDENCE ELLIPSOID

In this subsection, we review the useful frequentist tools developed by Abbasi-Yadkori et al. (2011) for estimating the unknown parameter  $\theta^*$  in linear bandit (LB) problems.

Consider an arbitrary sequence of actions  $(x_1, \dots, x_t)$  and their corresponding rewards  $(r_1, \dots, r_t)$ . In LB problems, the parameter  $\theta^*$  is typically estimated using the regularized least squares (RLS) estimator. Let  $\lambda$  be a fixed regularization parameter. The sample covariance matrix  $V_t$  and the RLS estimate  $\hat{\theta}_t$  are defined as follows:

$$V_t = \lambda_{\text{reg}} I_d + \sum_{s=1}^t x_s x_s^\top, \quad \hat{\theta}_t = V_t^{-1} \sum_{s=1}^t x_s r_s. \quad (1)$$

The following proposition from Abbasi-Yadkori et al. (2011) establishes that the RLS estimate  $\hat{\theta}_t$  concentrates around the true parameter  $\theta^*$  with high probability.

**Proposition 1** (Theorem 2 in Abbasi-Yadkori et al. (2011)). *Let  $\delta \in (0, 1)$  be a fixed confidence level. Then, with probability at least  $1 - \delta$ , it holds for all  $x \in \mathbb{R}^d$  that*

$$\left\| \hat{\theta}_t - \theta^* \right\|_{V_t} \leq \beta_{t, \delta, \lambda_{\text{reg}}}^{\text{RLS}}, \quad \left| \langle x, \hat{\theta}_t - \theta^* \rangle \right| \leq \|x\|_{V_t^{-1}} \beta_{t, \delta, \lambda_{\text{reg}}}^{\text{RLS}}$$

where the confidence bound  $\beta_{t, \delta, \lambda_{\text{reg}}}^{\text{RLS}}$  is defined as

$$\beta_{t, \delta, \lambda_{\text{reg}}}^{\text{RLS}} = R \sqrt{2 \log \frac{(\lambda_{\text{reg}} + t)^{d/2} \lambda_{\text{reg}}^{-d/2}}{\delta}} + \sqrt{\lambda_{\text{reg}}} S. \quad (2)$$

Hereafter, we might omit the dependence of  $\beta_t$  on  $\delta$  if there is no ambiguity. Proposition 1 enables us to construct the following sequence of confidence ellipsoids.

**Definition 1.** *Fix  $\delta \in (0, 1)$ . We define the RLS confidence ellipsoid as*

$$\mathcal{E}_t^{\text{RLS}}(\delta) = \{\theta \in \mathbb{R}^d : \|\theta - \hat{\theta}_t\|_{V_t} \leq \beta_{t, \delta, \lambda_{\text{reg}}}^{\text{RLS}}\}.$$

The next proposition, known as the *elliptical potential lemma*, plays a central role in bounding the regret. This proposition provides the key element in the work of Abbasi-Yadkori et al. (2011), showing that the cumulative prediction error incurred by the action sequence used to estimate  $\theta^*$  is small.

**Proposition 2** (Lemma 11 in Abbasi-Yadkori et al. (2011)). *If  $\lambda_{\text{reg}} > 1$ , for an arbitrary sequence  $(x_1, \dots, x_t)$ , it holds that  $\sum_{s=1}^t \|x_s\|_{V_s^{-1}}^2 \leq 2 \log \frac{\det(V_{t+1})}{\det(\lambda_{\text{reg}} I)} \leq 2d \log \left(1 + \frac{t}{\lambda_{\text{reg}}}\right)$ .*

## 3 POFUL ALGORITHMS

In this section, we introduce POFUL (Pivot OFUL), a generalized framework of OFUL. This framework enables a unified analysis of frequentist regret for common algorithms.



At a high level, POFUL is designed to encompass the exploration mechanism of OFUL and LinTS. POFUL takes as input a sequence of *inflation* parameters  $\{\iota_t\}_{t \in [T]}$ , feasible (randomized) *pivots*  $\{\tilde{\theta}_t\}_{t \in [T]}$  and *optimism* parameters  $\{\tau_t\}_{t \in [T]}$ . The inflation parameters are used to construct confidence ellipsoids that contain  $\{\tilde{\theta}_t\}_{t \in [T]}$  with high probability. This is formalized in the next definition.

**Definition 2.** Fix  $\delta \in (0, 1)$  and  $\delta' = \delta/2T$ . Given the inflation parameters  $\{\iota_t\}_{t \in [T]}$ , we call random variables  $\{\tilde{\theta}_t\}_{t \in [T]}$  feasible pivots if for all  $t \in [T]$ ,  $\mathbb{P}[\tilde{\theta}_t \in \mathcal{E}_t^{PVT}(\delta') | \mathcal{F}_t] \geq 1 - \delta'$ , where we define the “pivot ellipsoid” as  $\mathcal{E}_t^{PVT}(\delta) := \left\{ \theta \in \mathbb{R}^d : \|\theta - \tilde{\theta}_t\|_{V_t} \leq \iota_t \beta_{t, \delta, \lambda_{\text{reg}}}^{RLS} \right\}$ .

At each time  $t$ , POFUL chooses the action that maximizes the optimistic reward

$$\tilde{x}_t = \arg \max_{x \in \mathcal{X}_t} \left( \langle x, \tilde{\theta}_t \rangle + \tau_t \|x\|_{V_t^{-1} \beta_{t, \delta', \lambda_{\text{reg}}}^{RLS}} \right), \quad (3)$$

as shown in a pseudocode representation in Algorithm 1 and illustrated in Figure 1a.

Recall OFUL encourages exploration by introducing the uncertainty term  $\tau_t \|x\|_{V_t^{-1} \beta_{t, \delta', \lambda_{\text{reg}}}^{RLS}}$  in the reward, while LinTS explores through random sampling within the confidence ellipsoid. We let POFUL select an arbitrary pivot (which can be random) from  $\mathcal{E}_t^{PVT}$  and maximize the optimistic reward to encompass arbitrary exploration mechanisms within  $\mathcal{E}_t^{PVT}$ .

---

#### Algorithm 1 POFUL

---

**Require:**  $T, \delta, \lambda_{\text{reg}}, \{\iota_t\}_{t \in [T]}, \{\tau_t\}_{t \in [T]}$

Initialize  $V_0 \leftarrow \lambda \mathbb{I}, \hat{\theta}_1 \leftarrow 0, \delta' \leftarrow \delta/2T$

**for**  $t = 0, 1, \dots, T$  **do**

    Sample a feasible pivot  $\tilde{\theta}_t$  with respect to  $\iota_t$  according to Definition 2

$\tilde{x}_t \leftarrow \arg \max_{x \in \mathcal{X}_t} \left( \langle x, \tilde{\theta}_t \rangle + \tau_t \|x\|_{V_t^{-1} \beta_{t, \delta', \lambda_{\text{reg}}}^{RLS}} \right)$

    Observe reward  $r_t$

$V_{t+1} \leftarrow V_t + \tilde{x}_t \tilde{x}_t^\top$

$\hat{\theta}_{t+1} \leftarrow V_{t+1}^{-1} \sum_{s=1}^t \tilde{x}_s r_s$

**end for**

---

We demonstrate that POFUL encompasses OFUL, LinTS, TS-Freq, and Greedy as special cases, as illustrated in Figure 1b.

**Example 1 (OFUL).** For stochastic linear bandit problems, OFUL chooses actions by solving the optimization problem  $\max_{x \in \mathcal{X}_t} \langle x, \hat{\theta}_t \rangle + \|x\|_{V_t^{-1} \beta_{t, \delta', \lambda_{\text{reg}}}^{RLS}}$ . Therefore, OFUL is a special case of POFUL where  $\iota_t = 0, \tau_t = 1$  and  $\tilde{\theta}_t = \hat{\theta}_t$ , the center of the confidence ellipsoid, for all  $t \in [T]$ .

Before describing how TS can be derived as an instance of POFUL, we introduce a definition.

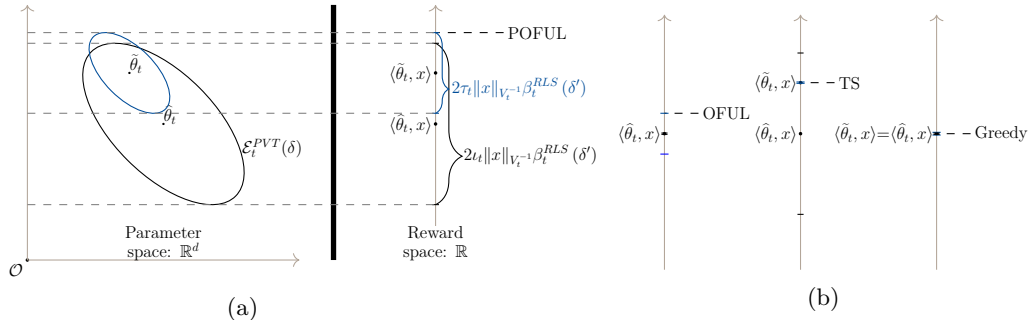

Figure 1: a) POFUL algorithm illustration. (b) Special cases: Greedy, TS, and OFUL.

**Definition 3.** Let  $\delta \in (0, 1)$ . We define  $\mathcal{D}^{SA}(\delta)$  as a distribution satisfying  $\mathbb{P}_{\eta \sim \mathcal{D}^{SA}(\delta)} [\|\eta\| \leq 1] \geq 1 - \delta$ .

**Example 2 (TS).** Linear Thompson Sampling (LinTS) algorithm is a generic randomized algorithm that samples from a distribution constructed from the RLS estimate at each step. At time  $t$ , LinTS samples as  $\tilde{\theta}_t = \hat{\theta}_t + \iota_t^{TS} \beta_t^{RLS}(\delta') V_t^{-\frac{1}{2}} \eta_t$ , where  $\delta' = \delta/2T$ , and  $\iota_t^{TS}$  is an inflation parameter controlling the scale of the sampling range, and  $\eta_t$  is a random sample from a normalized sampling distribution  $\mathcal{D}^{SA}(\delta')$  that concentrates with high probability. LinTS is a special case of POFUL where  $\iota_t = \iota_t^{TS}$ ,  $\tau_t = 0$  and  $\tilde{\theta}_t = \hat{\theta}_t + \iota_t^{TS} \beta_t^{RLS}(\delta') V_t^{-\frac{1}{2}} \eta_t$ . Setting the inflation parameter  $\iota_t = \tilde{O}(1)$  corresponds to the original LinTS algorithm. On the other hand, setting  $\iota_t = \tilde{O}(\sqrt{d})$  corresponds to the frequentist variant of LinTS studied in Agrawal & Goyal (2013); Abeille et al. (2017), namely TS-Freq. This means TS-Freq inflates the posterior by a factor of order  $\sqrt{d}$ .

**Example 3 (Greedy).** Greedy is a special case of POFUL with  $\iota_t = \tau_t = 0$ ,  $\tilde{\theta}_t = \hat{\theta}_t$ ,  $\forall t$ .

## 4 FREQUENTIST REGRET ANALYSIS OF POFUL

In this section, we present the frequentist regret analysis of POFUL algorithms. We defer all proofs to Appendix C. We first introduce useful concentration events that hold with high-probability.

**Definition 4.** Fix  $\delta \in (0, 1)$  and  $\delta' = \delta/2T$ . We define  $\beta_{t,\delta',\lambda_{reg}}^{PVT} := \iota_t(\delta) \beta_{t,\delta',\lambda_{reg}}^{RLS}$  and

$$\hat{\mathcal{A}}_t := \left\{ \forall s \leq t : \left\| \hat{\theta}_t - \theta^* \right\|_{V_t} \leq \beta_{t,\delta',\lambda_{reg}}^{RLS} \right\}, \quad \tilde{\mathcal{A}}_t := \left\{ \forall s \leq t : \left\| \tilde{\theta}_t - \hat{\theta}_t \right\|_{V_t} \leq \beta_{t,\delta',\lambda_{reg}}^{PVT} \right\}.$$

We also define  $\mathcal{A}_t := \hat{\mathcal{A}}_t \cap \tilde{\mathcal{A}}_t$ .

**Proposition 3.** Under Assumptions 1, 2 and 3, we have  $\mathbb{P}[\mathcal{A}_T] \geq 1 - \delta$ .

### 4.1 AN DATA-DRIVEN REGRET BOUND FOR POFUL

In the following, we condition on the event  $\mathcal{A}_T$  which holds with probability  $1 - \delta$ . The following proposition bounds the instantaneous regret of POFUL.

**Proposition 4.** Suppose  $\theta^* \in \mathcal{E}_t^{RLS}(\delta')$  and  $\tilde{\theta}_t \in \mathcal{E}_t^{PVT}(\delta')$ , it holds that

$$\langle x_t^*, \theta^* \rangle - \langle \tilde{x}_t, \theta^* \rangle \leq (1 + \iota_t - \tau_t) \|x_t^*\|_{V_t^{-1}} \beta_{t,\delta',\lambda_{reg}}^{RLS} + (1 + \iota_t + \tau_t) \|\tilde{x}_t\|_{V_t^{-1}} \beta_{t,\delta',\lambda_{reg}}^{RLS}. \quad (4)$$

Note that this upper bound is different from what's used in the optimism-based methods (Abbasi-Yadkori et al., 2011; Agrawal & Goyal, 2013; Abeille et al., 2017), we reproduce their upper bound and discuss the relationship of our method and theirs in Appendix D.

On the right-hand side of equation 4, since the oracle optimal action sequence  $\{x_t^*\}_{t \in [T]}$  is unknown to the algorithm and is different from the action sequence  $\{\tilde{x}_t\}_{t \in [T]}$  played by POFUL, one cannot apply Proposition 2 to bound the summation  $\sum_{t=1}^T \|\tilde{x}_t\|_{V_t^{-1}}^2$  and get an upperbound of the regret. To fix the problem due to this discrepancy, the key point is connecting  $\{\tilde{x}_t\}_{t \in [T]}$  and  $\{x_t^*\}_{t \in [T]}$  in terms of the  $V_t^{-1}$ -norm. This motivates the following definition.

**Definition 5.** For each  $t \geq 1$ , let  $\tilde{x}_t$  and  $x_t^*$  respectively denote the action chosen by POFUL and the optimal action. We define the uncertainty ratio at time  $t$  as  $\alpha_t := \|x_t^*\|_{V_t^{-1}} / \|\tilde{x}_t\|_{V_t^{-1}}$ . We also define the (instantaneous) regret proxy at time  $t$  as  $\mu_t := \alpha_t(1 + \iota_t - \tau_t) + 1 + \iota_t + \tau_t$ .

Note that  $\langle x, \hat{\theta}_t - \theta^* \rangle \leq \|x\|_{V_t^{-1}} \beta_t^{RLS}$  holds with high probability, we have that  $\|x\|_{V_t^{-1}}$  essentially determines the length of the confidence interval of the reward  $\langle x, \theta^* \rangle$ . Hence,  $\alpha_t$  serves as the ratio of uncertainty degrees of the reward obtained by the optimal action  $x_t^*$  and the chosen action  $\tilde{x}_t$ .

The intuition behind the definition for  $\mu_t$  is constructing a regret upper bound similar to that of OFUL. Specifically, Proposition 4 indicates  $\langle x_t^*, \theta^* \rangle - \langle \tilde{x}_t, \theta^* \rangle \leq \mu_t \|\tilde{x}_t\|_{V_t^{-1}} \beta_t^{RLS}$ , and we can check that the instantaneous regret of OFUL satisfies  $\langle x_t^*, \theta^* \rangle - \langle \tilde{x}_t, \theta^* \rangle \leq 2 \|\tilde{x}_t\|_{V_t^{-1}} \beta_t^{RLS}$ . In this sense,  $\mu_t$  is a proxy of the instantaneous regret incurred by POFUL at time  $t$ . Moreover, OFUL can be regarded as a POFUL algorithm whose  $\mu_t$  is fixed at 2, and we could extend the definition of  $\alpha_t$  to OFUL by solving  $\mu_t = \alpha_t(1 + \iota_t - \tau_t) + 1 + \iota_t + \tau_t$  and set  $\alpha_t = 1$  for all  $t \in [T]$  for OFUL (recall that in OFUL,  $\iota_t = 0$  and  $\tau_t = 1$  for all  $t \in [T]$ ).

The following Theorem connects  $\{\mu_t\}_{t \in [T]}$  and  $\mathcal{R}(T)$ . It provides an oracle but general frequentist regret upper bound for all POFUL algorithms.

**Theorem 1** (Oracle frequentist regret bound for POFUL). *Fix  $\delta \in (0, 1)$  and let  $\delta' = \delta/2T$ . Under Assumptions 1, 2 and 3, with probability  $1 - \delta$ , POFUL achieves a regret of*

$$\mathcal{R}(T) \leq \sqrt{2d \left( \sum_{t=1}^T \mu_t^2 \right) \log \left( 1 + \frac{T}{\lambda_{reg}} \right) \beta_{T, \delta', \lambda_{reg}}^{RLS}}. \quad (5)$$

**Remark 1.** We call Theorem 1 an oracle regret bound as  $\{\mu_t\}_{t \in [T]}$  for general POFUL depends on the unknown system parameter  $\theta^*$ . In general, they cannot be calculated by the decision-maker. Nevertheless, when we have upper bounds for  $\iota_t$  and  $\tau_t$ , as well as computable upper bounds  $\{\hat{\alpha}_t\}_{t \in [T]}$  for  $\{\alpha_t\}_{t \in [T]}$  respectively, using  $\mu_t^2 \leq 2\hat{\alpha}_t^2(1 + \iota_t - \tau_t)^2 + 2(1 + \iota_t + \tau_t)^2$ , we could calculate upper bounds for  $\{\mu_t\}_{t \in [T]}$  as well. Consequently, Theorem 1 instantly turns into a data-driven regret bound for POFUL and could be utilized later for course correction, which will be the aim of the next section. When we additionally know that  $1 + \iota_t - \tau_t$  is non-negative, we would use the equality  $\mu_t = \alpha_t(1 + \iota_t - \tau_t) + 1 + \iota_t + \tau_t$  directly for the bound.

**Remark 2.** In the Discussion section of Abeille et al. (2017), the authors introduce a concept similar to the reciprocal of our  $\alpha_t$ . They suggest that the necessity of proving LinTS samples are optimistic could be bypassed if for some  $\alpha > 0$  LinTS samples  $\tilde{\theta}_t$  such that  $\|x^*(\tilde{\theta}_t)\|_{V_t^{-1}} \geq \alpha \|x^*(\theta_t^*)\|_{V_t^{-1}}$  with constant probability, where  $x^*(\tilde{\theta}_t)$  and  $x^*(\theta_t^*)$  represent the optimal actions corresponding to  $\tilde{\theta}_t$  and  $\theta_t^*$ , respectively. They pose this as an open question regarding the possibility of relaxing the requirement of inflating the posterior. In the following section, we provide a positive answer to this question by studying the reciprocal of their  $\alpha$  using geometric arguments. This investigation offers an explanation for the empirical success of LinTS without the need for posterior inflation.

## 5 A DATA-DRIVEN APPROACH

In this section, we present the main contribution of this work which provides a data-driven approach to calibrating POFUL. Note that  $\iota_t$  and  $\tau_t$  are parameters of POFUL that can be controlled by a decision-maker, the essential point is to find a computable, non-trivial upper bound  $\hat{\alpha}_t$  for the uncertainty ratio  $\alpha_t$ , which turns into an upper bound  $\hat{\mu}_t$  for the regret proxy  $\mu_t$  that's deeply related to the frequentist regret of POFUL.

Typically, we can check that  $\hat{\alpha}_t$  is no less than one because when  $\tilde{x}_t = x_t^*$ , we have  $\alpha_t = \|x_t^*\|_{V_t^{-1}} / \|\tilde{x}_t\|_{V_t^{-1}} = 1$  and  $\hat{\alpha}_t$  is an upper bound for  $\alpha_t$ . As a result, it holds that  $\hat{\mu}_t = (1 + \hat{\alpha}_t)(1 + \iota_t) + (1 - \hat{\alpha}_t)\tau_t \leq (1 + \hat{\alpha}_t)(1 + \iota_t)$ , i.e., setting  $\tau_t = 0$  yields a valid upper bound for  $\hat{\mu}_t$ . Given this observation, we will focus on scenarios where  $\tau_t = 0$  for all  $t \in [T]$ . Such scenarios include LinTS and its variants like TS-Freq as well as Greedy - all of which are standard algorithms that still lack theoretical regret guarantee results.

In the subsequent analysis, we construct upper bounds  $\{\hat{\alpha}_t\}_{t \in [T]}$  for the continuous-action scenario. Bounds for the discrete-action scenario are in Appendix E.

### 5.1 CONTINUOUS ACTION SPACE.

Our strategy capitalizes on geometric insights related to the properties of the confidence ellipsoids, providing upper bounds that can be computed efficiently.

For the sake of a better illustration, we consider  $\mathcal{X}_t = \mathcal{S}_{d-1}$  for all  $t \in [T]$  for this scenario, where  $\mathcal{S}_{d-1} = \{x \in \mathbb{R}^d : \|x\| = 1\}$  is the unit hypersphere in  $\mathbb{R}^d$ . This is a standard example of continuous action space, and is the same as the setting considered in Abeille et al. (2017). We remark that for this specific setting, the problem is still hard. This is because we don't have a closed-form solution for the set of potentially optimal actions.

In this setting, the optimal action  $x_t^*(\theta) := \arg \max_{x \in \mathcal{X}_t} \langle x, \theta \rangle$  takes the form  $x_t^*(\theta) = \theta / \|\theta\|$ . To upper bound  $\alpha_t$ , we consider respectively the smallest and largest value of  $\|x_t^*(\theta)\|_{V_t^{-1}}$  for  $\theta$  in the confidence ellipsoids of  $\theta$ , namely,  $\mathcal{E}_t^{RLS}$  and  $\mathcal{E}_t^{PVT}$ . Specifically, we have

$$\alpha_t \leq \frac{\sup_{\theta \in \mathcal{E}_t^{RLS}} \|x_t^*(\theta)\|_{V_t^{-1}}}{\inf_{\theta \in \mathcal{E}_t^{PVT}} \|x_t^*(\theta)\|_{V_t^{-1}}}. \quad (6)$$

As is illustrated in Figure 2, the set of potentially optimal actions  $\mathcal{C}_t$  is the projection of the confidence ellipsoid  $\mathcal{E}_t$  onto  $\mathcal{S}_{d-1}$ . It's hard to get a closed-form expression for  $\mathcal{C}_t$ , so we cannot directly calculate the range of  $V_t^{-1}$ -norm of actions in  $\mathcal{C}_t$ . Nevertheless, we can approximate the range by investigating the geometric properties of the ellipsoids.

The intuition here is that, when POFUL has implemented sufficient exploration so that  $\mathcal{E}_t$  is small enough,  $\mathcal{C}_t$  concentrates accordingly to a small cap on  $\mathcal{S}_{d-1}$ . All actions within  $\mathcal{C}_t$  point to similar directions and thus have similar  $V_t$ -norm. (Note that for a unit vector  $x$ , we have that  $\|x\|_{V_t}$  can be written as a weighted summation of the eigenvalues of  $V_t$ , where the weights are determined by the direction of  $x$ .) Therefore, it is possible to estimate the range of the  $V_t$ -norm by employing geometric reasoning. Subsequently, this estimated range will be utilized to ascertain the range of the  $V_t^{-1}$ -norm.

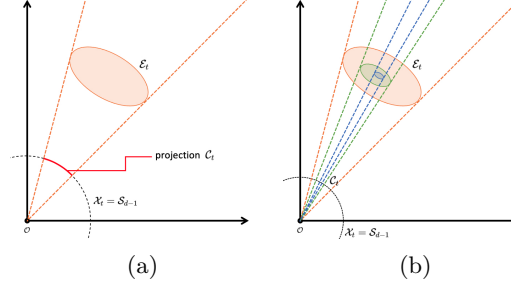

Figure 2: Illustration of potentially optimal actions set  $\mathcal{C}_t$  in  $\mathbb{R}^2$ . (a):  $\mathcal{C}_t$  is  $\mathcal{E}_t$ 's projection onto  $\mathcal{S}_{d-1}$ . (b): As more data is collected,  $\mathcal{E}_t$  shrinks (colors show exploration levels). Potentially optimal actions point in similar directions, determining their  $V_t$ -norm. This suggests their  $V_t$ -norm range could be estimated geometrically.

The main theorem (proved in Section A) derives an upper bound for  $\alpha_t$  based on this idea.

**Theorem 2.** Suppose  $\mathcal{X}_t = \mathcal{S}_{d-1}$  for all  $t \in [T]$ . Define  $m_t = (\|\hat{\theta}_t\|_{V_t}^2 - (\beta_t^{RLS})^2) / (\|\hat{\theta}_t\| + \beta_t^{RLS} / \lambda_d(V_t))^2$ ,  $M_t = \|\hat{\theta}_t\|_{V_t}^2 / (\|\hat{\theta}_t\|_{V_t}^2 - (\beta_t^{PVT})^2)$ . Let  $k \in [d]$  be the integer that satisfies  $\lambda_k(V) \leq M_t \leq \lambda_{k+1}(V)$ . Define  $\beta_t^{PVT} := \iota_t \beta_t^{RLS}$  and

$$\Phi_t = \begin{cases} (\lambda_1^{-1}(V_t) + \lambda_d^{-1}(V_t) - m_t \lambda_1^{-1}(V_t) \lambda_d^{-1}(V_t))^{\frac{1}{2}}, & \text{if } \|\hat{\theta}_t\|_{V_t} \geq \beta_t^{RLS} \\ \lambda_d^{-\frac{1}{2}}(V_t), & \text{if } \|\hat{\theta}_t\|_{V_t} < \beta_t^{RLS} \end{cases},$$

$$\Psi_t = \begin{cases} (\lambda_k^{-1}(V_t) + \lambda_{k+1}^{-1}(V_t) - M_t \lambda_k^{-1}(V_t) \lambda_{k+1}^{-1}(V_t))^{\frac{1}{2}}, & \text{if } \|\hat{\theta}_t\|_{V_t} \geq \beta_t^{PVT} \\ \lambda_1^{-\frac{1}{2}}(V_t), & \text{if } \|\hat{\theta}_t\|_{V_t} < \beta_t^{PVT} \end{cases}.$$

Then for all  $t \in [T]$ , conditioned on  $\hat{\mathcal{A}}_t \cap \tilde{\mathcal{A}}_t$ , it holds for all  $s \leq t$  that  $\alpha_s \leq \hat{\alpha}_s := \Phi_s / \Psi_s$ .

To better understand what Theorem 2 implies, we discuss some special cases in Appendix G and provide empirical validations for them.

## 6 A META-ALGORITHM FOR COURSE-CORRECTION

This section demonstrates how the data-driven regret bound can enhance standard bandit algorithms. We propose a meta-algorithm that creates course-corrected variants of base algorithms, achieving minimax-optimal frequentist regret guarantees while preserving most original characteristics, including computational efficiency and typically low regret.

We take LinTS as an example of the base algorithm, and propose the algorithm Linear Thompson Sampling with Maximum Regret (Proxy) (TS-MR). The idea is to measure the performance of LinTS using  $\hat{\mu}_t$  and avoid bad LinTS actions by switching to OFUL actions. Specifically, at each time  $t$ , TS-MR calculates the upper bound  $\hat{\mu}_t$  and compares it with a preset threshold  $\mu$ . If  $\hat{\mu}_t > \mu$ , LinTS might be problematic and TS-MR takes an OFUL action to ensure a low instantaneous regret; if  $\hat{\mu}_t \leq \mu$ , TS-MR takes the LinTS action. We remark that setting  $\iota_t = 0$  for all  $t \in [T]$  yields the corresponding Greedy-MR algorithm. The pseudocode is presented in Algorithm 2 in Appendix H.

By design, course-corrected algorithms maintain  $\mu_t \leq \max\{\mu, 2\}$  for all  $t \in [T]$ . Theorem 1 yields their optimal frequentist regret, up to a constant factor.

**Corollary 1.** *TS-MR and Greedy-MR achieve a frequentist regret of  $\tilde{O}(\max\{\mu, 2\}d\sqrt{T})$ .*

*Proof.* Note that  $\mu_t \leq \max\{\mu, 2\}$ , by Theorem 1, we have

$$\mathcal{R}(T) \leq \sqrt{2dT(\max\{\mu, 2\})^2 \log\left(1 + \frac{T}{\lambda_{\text{reg}}}\right)} \beta_{T, \delta', \lambda_{\text{reg}}}^{\text{RLS}} = \tilde{O}(\max\{\mu, 2\}d\sqrt{T}).$$

□

**Remark 3.** *In practice, the choice of the threshold  $\mu$  depends on the problem settings. In a high-risk setting where LinTS and Greedy fail with high probability, one can set a small  $\mu$  so that TS-MR and Greedy-MR select more OFUL actions to guarantee the necessary amount of exploration. In a low-risk setting where original LinTS and Greedy algorithms work well, one can set a large  $\mu$  and hence TS-MR and Greedy-MR select TS and greedy actions respectively to avoid unnecessary exploration and save the computational cost.*

## 7 SIMULATIONS

We aim to compare TS-MR, Greedy-MR, and key baseline algorithms, via simulation.

### 7.1 SYNTHETIC DATASETS

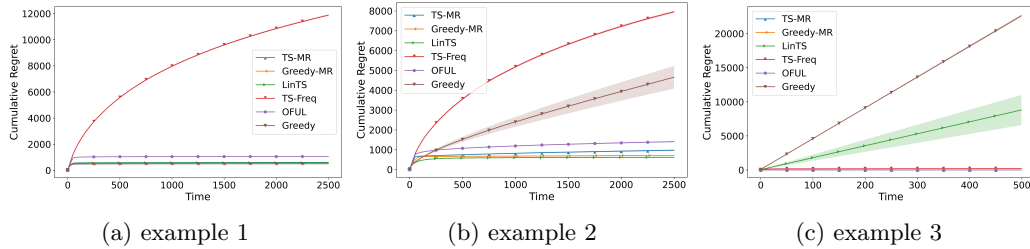

Figure 3: Comparison of the cumulative regret incurred by TS-MR and Greedy-MR, versus the baseline algorithms in Examples 1-3.

We conduct simulations on three representative synthetic examples. The detailed experimental setups for these examples are presented in Appendix F.

**Example 1. Stochastic linear bandit with uniformly and independently distributed actions.** This is a basic example of standard stochastic linear bandit problems without any extra structure. TS-Freq shows pessimistic regret due to the inflation of the posterior, while other algorithms in general perform well.

**Example 2. Contextual bandits embedded in the linear bandit problem (Abbasi-Yadkori, 2013).** In this setting, Greedy performs suboptimally due to a lack of exploration for some arms. Nevertheless, Greedy-MR outperforms both Greedy and OFUL by adaptively choosing OFUL actions only when it detects large regret proxy  $\hat{\mu}_t$ .

**Example 3. Prior mean mismatch (Hamidi & Bayati, 2020a).** This is an example in which LinTS is proven to incur linear Bayesian regret. We see both LinTS and Greedy incur linear regrets as expected, while TS-MR and Greedy-MR, switch to OFUL adaptively to tackle this hard problem and achieve sublinear regret.

## 7.2 REAL-WORLD DATASETS

We explore the performance of standard POFUL algorithms and the proposed TS-MR and Greedy-MR algorithms on real-world datasets. We consider three datasets for classification tasks on the OPENML platform, Cardiotocography, JapaneseVowels and Segment. They focus on healthcare, pattern recognition, and computer vision problems respectively.

**Setup.** We follow the approach in the literature (Bietti et al., 2021; Bastani et al., 2021) that converts classification tasks to contextual bandit problems, and then embeds it into linear bandit problems in the same way as Example 2 in Section 7.1. Specifically, we regard each class as an action so that at each time, the decision-maker assigns a class to the feature observed and receives a binary reward, namely 1 for assigning the correct class and 0 otherwise, plus a Gaussian noise.

We plot the cumulative regret (averaged over 100 runs) for all algorithms. Figure 4 shows that for all real-world datasets: OFUL and TS-Freq perform poorly due to their conservative exploration; LinTS and Greedy are achieving empirical success even though they don't have theoretical guarantees; TS-MR and Greedy-MR retain the desirable empirical performance of LinTS and Greedy, while enjoying the minimax optimal frequentist regret bound.

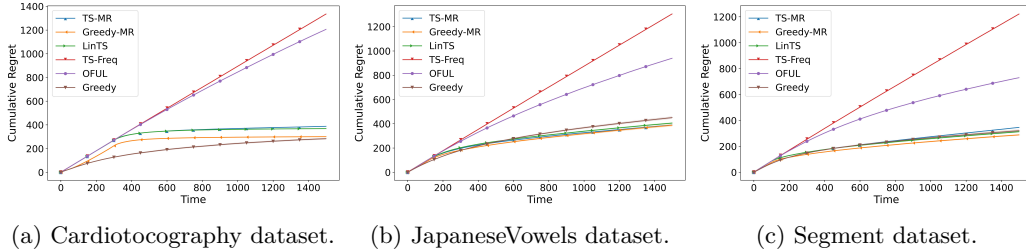

Figure 4: Cumulative regret of all algorithms on real-world datasets.

## 8 CONCLUSION

In this work, we propose a data-driven framework to analyze the frequentist regret of POFUL, a family of algorithms that includes OFUL, LinTS, TS-Freq, and Greedy as special cases. Our approach allows for the computation of a data-driven frequentist regret bound for POFUL during implementation, which subsequently informs the course-correction of the algorithm. Our technique conducts a novel real-time geometric analysis of the  $d$ -dimensional confidence ellipsoid to fully leverage the historical information and might be of independent interest. As applications, we propose TS-MR and Greedy-MR algorithms that enjoy provable minimax optimal frequentist regret and demonstrate their ability to adaptively switch to OFUL when necessary in hard problems where LinTS and Greedy fail. We hope this work provides a steady step towards bridging the gap between theoretical guarantees and empirical performance of bandit algorithms such as LinTS and Greedy.



## REFERENCES

- Yasin Abbasi-Yadkori. Online learning for linearly parametrized control problems. 2013.
- Yasin Abbasi-Yadkori, Dávid Pál, and Csaba Szepesvári. Improved algorithms for linear stochastic bandits. In *Advances in Neural Information Processing Systems*, pp. 2312–2320, 2011.
- Marc Abeille, Alessandro Lazaric, et al. Linear thompson sampling revisited. *Electronic Journal of Statistics*, 11(2):5165–5197, 2017.
- Shipra Agrawal. *Recent Advances in Multiarmed Bandits for Sequential Decision Making*, chapter 7, pp. 167–188. 2019. doi: 10.1287/educ.2019.0204. URL <https://pubsonline.informs.org/doi/abs/10.1287/educ.2019.0204>.
- Shipra Agrawal and Navin Goyal. Thompson sampling for contextual bandits with linear payoffs. In Sanjoy Dasgupta and David McAllester (eds.), *Proceedings of the 30th International Conference on Machine Learning*, volume 28 of *Proceedings of Machine Learning Research*, pp. 127–135, Atlanta, Georgia, USA, 17–19 Jun 2013. PMLR. URL <https://proceedings.mlr.press/v28/agrawal13.html>.
- Peter Auer. Using confidence bounds for exploitation-exploration trade-offs. *Journal of Machine Learning Research*, 3(Nov):397–422, 2002.
- Hamsa Bastani and Mohsen Bayati. Online decision making with high-dimensional covariates. *Operations Research*, 68(1):276–294, 2020. doi: 10.1287/opre.2019.1902.
- Hamsa Bastani, Mohsen Bayati, and Khashayar Khosravi. Mostly exploration-free algorithms for contextual bandits. *Management Science*, 67(3):1329–1349, 2021. doi: 10.1287/mnsc.2020.3605.
- Alberto Bietti, Alekh Agarwal, and John Langford. A contextual bandit bake-off. *Journal of Machine Learning Research*, 22(133):1–49, 2021. URL <http://jmlr.org/papers/v22/18-863.html>.
- Maxime C Cohen, Ilan Lobel, and Renato Paes Leme. Feature-based dynamic pricing. *Management Science*, 66(11):5213–5228, 2020. doi: 10.1287/mnsc.2019.3485. URL <https://doi.org/10.1287/mnsc.2019.3485>.
- Varsha Dani, Thomas P. Hayes, and Sham M. Kakade. Stochastic linear optimization under bandit feedback. In *COLT*, 2008.
- Shi Dong and Benjamin Van Roy. An information-theoretic analysis for thompson sampling with many actions. In *Advances in Neural Information Processing Systems*, pp. 4157–4165, 2018.
- Nima Hamidi and Mohsen Bayati. On frequentist regret of linear thompson sampling, 2020a.
- Nima Hamidi and Mohsen Bayati. A general theory of the stochastic linear bandit and its applications. *arXiv preprint arXiv:2002.05152*, 2020b.
- Botao Hao, Tor Lattimore, and Csaba Szepesvari. Adaptive exploration in linear contextual bandit, 2020.
- Sampath Kannan, Jamie H Morgenstern, Aaron Roth, Bo Waggoner, and Zhiwei Steven Wu. A smoothed analysis of the greedy algorithm for the linear contextual bandit problem. In *Advances in Neural Information Processing Systems*, pp. 2227–2236, 2018.
- Johannes Kirschner and Andreas Krause. Information directed sampling and bandits with heteroscedastic noise. In *Proc. International Conference on Learning Theory (COLT)*, July 2018.
- Tomáš Kocák, Rémi Munos, Branislav Kveton, Shipra Agrawal, and Michal Valko. Spectral bandits. *J. Mach. Learn. Res.*, 21(1), jan 2020. ISSN 1532-4435.



- Tomáš Kocák and Aurélien Garivier. Best arm identification in spectral bandits, 2020.
- Tomáš Kocák, Michal Valko, Rémi Munos, and Shipra Agrawal. Spectral Thompson Sampling. 28(1), 2014. doi: 10.1609/aaai.v28i1.9011. URL <https://ojs.aaai.org/index.php/AAAI/article/view/9011>.
- Tze Leung Lai and Herbert Robbins. Asymptotically efficient adaptive allocation rules. *Advances in applied mathematics*, 6(1):4–22, 1985.
- John Langford and Tong Zhang. The epoch-greedy algorithm for multi-armed bandits with side information. In J. C. Platt, D. Koller, Y. Singer, and S. T. Roweis (eds.), *Advances in Neural Information Processing Systems 20*, pp. 817–824. Curran Associates, Inc., 2008.
- Tor Lattimore and Csaba Szepesvari. The end of optimism? an asymptotic analysis of finite-armed linear bandits. In *Artificial Intelligence and Statistics*, pp. 728–737. PMLR, 2017.
- Lihong Li, Wei Chu, John Langford, and Robert E Schapire. A contextual-bandit approach to personalized news article recommendation. In *Proceedings of the 19th international conference on World wide web*, pp. 661–670. ACM, 2010.
- Aldo Pacchiano, Christoph Dann, Claudio Gentile, and Peter Bartlett. Regret Bound Balancing and Elimination for Model Selection in Bandits and RL. *arXiv e-prints*, art. arXiv:2012.13045, December 2020. doi: 10.48550/arXiv.2012.13045.
- Manish Raghavan, Aleksandrs Slivkins, Jennifer Wortman Vaughan, and Zhiwei Steven Wu. The externalities of exploration and how data diversity helps exploitation, 2018.
- Paat Rusmevichientong and John N Tsitsiklis. Linearly parameterized bandits. *Mathematics of Operations Research*, 35(2):395–411, 2010.
- Daniel Russo and Benjamin Van Roy. Learning to optimize via posterior sampling. *Mathematics of Operations Research*, 39(4):1221–1243, 2014. doi: 10.1287/moor.2014.0650.
- Daniel Russo and Benjamin Van Roy. An information-theoretic analysis of thompson sampling. *The Journal of Machine Learning Research*, 17(1):2442–2471, 2016.
- Daniel J. Russo, Benjamin Van Roy, Abbas Kazerouni, Ian Osband, and Zheng Wen. A tutorial on thompson sampling. *Foundations and Trends in Machine Learning*, 11(1): 1–96, 2018. URL <http://dx.doi.org/10.1561/22000000070>.
- Ambuj Tewari and Susan A Murphy. From ads to interventions: Contextual bandits in mobile health. In *Mobile Health*, pp. 495–517. Springer, 2017.
- William R Thompson. On the likelihood that one unknown probability exceeds another in view of the evidence of two samples. *Biometrika*, 25(3-4):285–294, 1933.
- Michal Valko, Remi Munos, Branislav Kveton, and Tomáš Kocák. Spectral bandits for smooth graph functions. In Eric P. Xing and Tony Jebara (eds.), *Proceedings of the 31st International Conference on Machine Learning*, volume 32 of *Proceedings of Machine Learning Research*, pp. 46–54, Beijing, China, 22–24 Jun 2014. PMLR. URL <https://proceedings.mlr.press/v32/valko14.html>.
- Sofía S Villar, Jack Bowden, and James Wason. Multi-armed bandit models for the optimal design of clinical trials: benefits and challenges. *Statistical science: a review journal of the Institute of Mathematical Statistics*, 30(2):199, 2015.
- Wenbin Zhou, Lihong Li, and Quanquan Gu. A survey on contextual multi-armed bandits. *arXiv preprint arXiv:2004.13136*, 2020.

## A SKETCH OF THE PROOF

In this section, we present the proof of Theorem 2. In the remaining part of this section, we use a general confidence ellipsoid  $\mathcal{E}_t(\delta) := \{\theta \in \mathbb{R}^d : \|\theta - \hat{\theta}_t\|_{V_t} \leq \beta_t(\delta)\}$  to represent  $\mathcal{E}_t^{RLS}$  and  $\mathcal{E}_t^{PVT}$ , since the proof works for both of them.

First note that, when  $\|\hat{\theta}_t\|_{V_t} < \beta_t$ , the bound in Theorem 2 becomes

$$\alpha_t \leq \lambda_d^{-\frac{1}{2}}(V_t) / \lambda_1^{-\frac{1}{2}}(V_t) = \sqrt{\lambda_1(V_t) / \lambda_d(V_t)}.$$

This bound holds trivially using the fact that  $\lambda_1(V_t) \leq \|x\|_{V_t}^2 \leq \lambda_d(V_t)$ . This is the case when the data is insufficient and the confidence interval is too large to get a non-trivial upper bound for  $\alpha_t$ .

In the following, without loss of generality we assume  $\|\hat{\theta}_t\|_{V_t}^2 \geq \beta_t^2$ . The proof decomposes into three steps. In the first two steps, as is illustrated in  $\mathbb{R}^2$  in Figure 5, we cut out a special hypersurface  $\mathcal{H}_t$  within  $\mathcal{E}_t$  and show that for all  $\theta \in \mathcal{H}_t$ , the corresponding optimal action  $x^*(\theta)$  has  $V_t$ -norm bounded from above and below. Note that the set of optimal actions for  $\theta \in \mathcal{H}_t$  coincides with that for  $\theta \in \mathcal{E}_t$ , we get upper and lower bounds for  $V_t$ -norm of all potential actions in the ellipsoid. Next, we show that upper and lower bounds for the  $V_t$ -norm can be converted into upper and lower bounds for the  $V_t^{-1}$ -norm by solving a linear programming problem. Hence, we get an upper bound for  $\alpha_t$  by calculating the ratio of the upper bound to the lower bound. We sketch the proof below and postpone the detailed proof for all lemmas in this section to Appendix B.

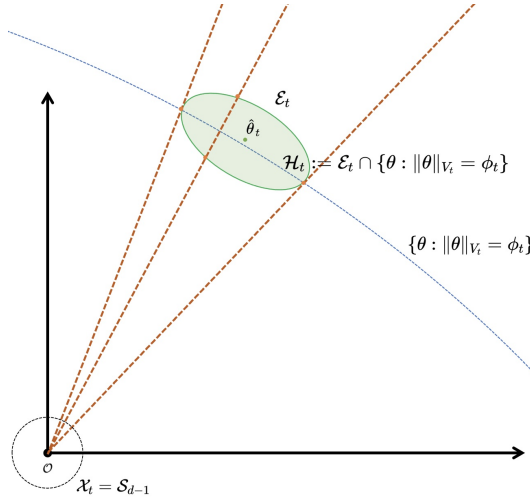

Figure 5: Illustration of Step 1 and 2 in  $\mathbb{R}^2$ . Orange dashed rays: rays starting from the origin might have different numbers of intersections with  $\mathcal{E}_t$ , indicating whether the corresponding action lies in the projection of  $\mathcal{E}_t$  onto  $\mathcal{S}_{d-1}$ . Blue dashed curve: the ellipsoid with fixed  $V_t$ -norm  $\{\theta : \|\theta\|_{V_t} = \phi_t\}$ . The intersection of this ellipsoid and  $\mathcal{E}_t$  has the same projection as  $\mathcal{E}_t$  onto  $\mathcal{S}_{d-1}$ .

In the following, we let  $\phi_t := \sqrt{\|\hat{\theta}_t\|_{V_t}^2 - \beta_t^2}$ , which is well-defined since we assume  $\|\hat{\theta}_t\|_{V_t} \geq \beta_t$ . In geometry, one can show that for a ray starting from the origin and intersecting  $\mathcal{E}_t$  only at one point,  $\phi_t$  is the  $V_t$ -norm of the intersection point.

**Step 1. Upper Bounding the  $V_t$ -norm of actions.** Our first lemma investigates such intersection and provides an upper bound for the  $V_t$ -norm for the optimal actions corresponding to any  $\theta \in \mathcal{E}_t$ . The proof is based on investigating the condition for a ray paralleling an action  $x \in \mathcal{S}_{d-1}$  to intersect with  $\mathcal{E}_t$ , which means  $x$  is in the projection of  $\mathcal{E}_t$  onto  $\mathcal{S}_{d-1}$  and might become the optimal action  $x^*(\theta)$ .

**Lemma 1.** For any  $\theta \in \mathcal{E}_t$ , we have  $\|x^*(\theta)\|_{V_t} \leq \|\hat{\theta}_t\|_{V_t^2}/\phi_t$ .

**Step 2. Lower Bounding the  $V_t$ -norm of actions.** In order to lower bound the  $V_t$ -norm, we define the hypersurface  $\mathcal{H}_t := \mathcal{E}_t \cap \{\theta : \|\theta\|_{V_t} = \phi_t\}$ , i.e., the intersection of the interior of the confidence ellipsoid  $\mathcal{E}_t$  and the ellipsoid  $\{\theta : \|\theta\|_{V_t} = \phi_t\}$ .  $\mathcal{H}_t$  consists of  $\theta \in \mathcal{E}_t$  whose  $V_t$ -norm is  $\phi_t$ . One can check  $\mathcal{H}_t$  is non-empty since  $\phi_t \hat{\theta}_t / \|\hat{\theta}_t\|_{V_t} \in \mathcal{E}_t$ , and the projection of  $\mathcal{H}_t$  onto  $\mathcal{S}_{d-1}$  is the same as that of  $\mathcal{E}_t$  by convexity. Hence, it suffices to only consider  $\theta \in \mathcal{H}_t$  as the corresponding set of optimal actions coincides. A lower bound for the  $V_t$ -norm is given by the following lemma.

**Lemma 2.** For any  $\theta \in \mathcal{E}_t$ , we have

$$\|x^*(\theta)\|_{V_t} \geq \frac{\phi_t}{\|\hat{\theta}_t\| + \beta_t/\lambda_d(V_t)}.$$

The proof is directly using the fact that for any  $\theta \in \mathcal{H}_t$ , we have  $\|\theta\| \leq \|\hat{\theta}_t\| + \beta_t/\lambda_d(V_t)$  and  $\|\theta\|_{V_t} = \phi_t$ . Also recall  $x^*(\theta) = \theta/\|\theta\|$  and hence  $\|x^*(\theta)\|_{V_t} = \|\theta\|_{V_t}/\|\theta\|$ .

**Step 3. Bounding the  $V_t^{-1}$ -norm of actions** The following lemma determines the range of action  $x$ 's  $V_t^{-1}$ -norm based on its  $V_t$ -norm range. It turns out that the two ranges can be related using the spectral information of the sample covariance matrix  $V_t$ , which is related to the shape of the confidence ellipsoid.

**Lemma 3.** Let  $\{\lambda_1, \lambda_2, \dots, \lambda_{N_V}\}$  be the set of distinct eigenvalues of  $V$  such that  $\lambda_1 > \lambda_2 > \dots > \lambda_{N_V} > 0$ . Let  $x \in \mathcal{B}_d$  satisfies  $0 < m \leq \|x\|_V^2 \leq M$ . We have

$$\frac{1}{\lambda_k} + \frac{1}{\lambda_{k+1}} - \frac{M}{\lambda_k \lambda_{k+1}} \leq \|x\|_{V^{-1}}^2 \leq \frac{1}{\lambda_1} + \frac{1}{\lambda_d} - \frac{m}{\lambda_1 \lambda_d}, \quad (7)$$

where  $k$  is such that  $\lambda_k = \max_{i \in [N_V]} \{\lambda_i \geq M\}$ .

The proof involves expressing the  $V$ - and  $V^{-1}$ -norms as weighted sums of  $V$ 's eigenvalues, then solving a linear programming (LP) problem constrained by the norm ranges.

By inserting the upper and lower bounds of the  $V_t$ -norm from Lemmas 1 and 2 into Lemma 3, we finalize the proof of Theorem 2.

## B PROOF OF LEMMAS FOR THEOREM 2

### B.1 PROOF OF LEMMA 1

*Proof.* Let  $\theta = tx$  where  $x$  is any unit vector in  $\mathbb{R}^d$  and  $t \in \mathbb{R}^+$  is a scalar. Consider the equation that characterizes the intersection  $\{tx : t \in \mathbb{R}^+\} \cap \mathcal{E}_t$ , namely  $(tx - \hat{\theta}_t)^\top V_t (tx - \hat{\theta}_t) \leq \beta_t^2$ . Equivalently, we have  $t^2 \|x\|_{V_t}^2 - 2tx^\top V_t \hat{\theta}_t + \phi_t^2 \leq 0$ . This quadratic inequality of  $t$  has at least one solution if the discriminant is non-negative, i.e.  $4(x^\top V_t \hat{\theta}_t)^2 \geq 4\|x\|_{V_t}^2 \phi_t^2$ . Then by direct computation,

$$\|x\|_{V_t} \leq \frac{\sqrt{(x^\top V_t \hat{\theta}_t)^2}}{\phi_t} \leq \frac{\sqrt{x^\top x} \sqrt{(\hat{\theta}_t)^\top V_t^\top V_t \hat{\theta}_t}}{\phi_t} = \frac{\|\hat{\theta}_t\|_{V_t^2}}{\phi_t}.$$

Note that  $\theta \in \mathcal{E}_t$  if and only if  $\theta$  is on a ray starting from the origin and intersects  $\mathcal{E}_t$  at one or more points. Namely,  $\theta = tx$  for some  $x$  that satisfies  $4(x^\top V_t \hat{\theta}_t)^2 \geq 4\|x\|_{V_t}^2 \phi_t^2$ , we conclude the proof.  $\square$

## B.2 PROOF OF LEMMA 2

*Proof.* Note that for any  $\theta \in \mathcal{H}_t \subset \mathcal{E}_t$ , it holds that  $\|\theta\| \leq \|\hat{\theta}_t\| + \beta_t/\lambda_d(V_t)$ . Also, by the construction of  $\mathcal{H}_t$ , we have  $\|\theta\|_{V_t} = \phi_t$ . Then by direct computation, we have

$$\|x^*(\theta)\|_{V_t} = \frac{\|\theta\|_{V_t}}{\|\theta\|} \geq \frac{\phi_t}{\|\hat{\theta}_t\| + \beta_t/\lambda_d(V_t)}.$$

To prove the same result for any  $\theta \in \mathcal{E}_t$ , we only need to show there exists  $\theta' \in \mathcal{H}_t$  such that  $x^*(\theta) = x^*(\theta')$ . To see this, let  $x = \theta/\|\theta\|$  and consider the intersection  $\{tx : t \in \mathbb{R}^+\} \cap \mathcal{E}_t$ , which is non-empty by our choice of  $\theta$ . Similar to the proof of Lemma 1, the discriminant is non-negative, i.e.  $4(x^\top V_t \hat{\theta})^2 \geq 4\|x\|_{V_t}^2 \phi_t^2$ .

Now consider the intersection  $\{tx : t \in \mathbb{R}\} \cap \partial\mathcal{E}_t$ , where we let  $\partial\mathcal{E}_t := \{\theta \in \mathbb{R}^d : \|\theta - \hat{\theta}_t\|_{V_t} = \beta_t(\delta)\}$  be the border of the ellipsoid. The intersection points are characterized by the solution to

$$t^2\|x\|_{V_t}^2 - 2tx^\top V_t \hat{\theta}_t + \phi_t^2 = 0. \quad (8)$$

If  $4(x^\top V_t \hat{\theta})^2 = 4\|x\|_{V_t}^2 \phi_t^2$  and there is only one intersection point, namely  $\theta$  itself, we have

$$0 = t^2\|x\|_{V_t}^2 - 2tx^\top V_t \hat{\theta}_t + \phi_t^2 = t^2\|x\|_{V_t}^2 - 2t\|x\|_{V_t} \phi_t + \phi_t^2 = (\|tx\|_{V_t} - \phi_t)^2.$$

Therefore, we have  $\|\theta\|_{V_t} = \|tx\|_{V_t} = \phi_t$ , i.e.  $\theta \in \mathcal{H}_t$ .

If  $4(x^\top V_t \hat{\theta})^2 > 4\|x\|_{V_t}^2 \phi_t^2$ , it follows that  $x^\top V_t \hat{\theta} > \|x\|_{V_t} \phi_t$ . This inference is valid given that  $x^\top V_t \hat{\theta} > 0$ , which can be verified using Equation equation 8 and noting that  $t > 0$ . Consider the solutions to equation 8

$$t_1 = \frac{x^\top V_t \hat{\theta}_t - \sqrt{(x^\top V_t \hat{\theta})^2 - \|x\|_{V_t}^2 \phi_t^2}}{\|x\|_{V_t}^2}, \quad t_2 = \frac{x^\top V_t \hat{\theta}_t + \sqrt{(x^\top V_t \hat{\theta})^2 - \|x\|_{V_t}^2 \phi_t^2}}{\|x\|_{V_t}^2}.$$

We only need to show  $\|t_1 x\|_{V_t} < \phi_t < \|t_2 x\|_{V_t}$ , then by the continuity of  $\|\cdot\|_{V_t}$  and the convexity of  $\mathcal{E}_t$ , there exists  $t' \in (t_1, t_2)$  such that  $\|t' x\|_{V_t} = \phi_t$ . Then  $\theta' := t' x \in \mathcal{H}_t$  is the desired point. By direct computation,

$$\|t_1 x\|_{V_t} = \frac{x^\top V_t \hat{\theta}_t - \sqrt{(x^\top V_t \hat{\theta})^2 - \|x\|_{V_t}^2 \phi_t^2}}{\|x\|_{V_t}}.$$

We only need to prove

$$x^\top V_t \hat{\theta}_t - \|x\|_{V_t} \phi_t \leq \sqrt{(x^\top V_t \hat{\theta})^2 - \|x\|_{V_t}^2 \phi_t^2}$$

Note that

$$\begin{aligned} (x^\top V_t \hat{\theta}_t - \|x\|_{V_t} \phi_t)^2 &= (x^\top V_t \hat{\theta})^2 - 2x^\top V_t \hat{\theta}_t \|x\|_{V_t} + \|x\|_{V_t}^2 \phi_t^2 \\ &\leq (x^\top V_t \hat{\theta})^2 - 2\|x\|_{V_t}^2 \phi_t^2 + \|x\|_{V_t}^2 \phi_t^2 \\ &= (x^\top V_t \hat{\theta})^2 - \|x\|_{V_t}^2 \phi_t^2 \end{aligned}$$

where we have used the fact that  $x^\top V_t \hat{\theta} > \|x\|_{V_t} \phi_t$  in the inequity. Taking square root for both sides yields the desired result, and hence  $\|t_1 x\|_{V_t} < \phi_t$ . Similarly, one can show  $\phi_t < \|t_2 x\|_{V_t}$ . This concludes the proof.  $\square$

## B.3 PROOF OF LEMMA 3

*Proof.* Let  $\{\lambda_1, \lambda_2, \dots, \lambda_{N_V}\}$  be the set of distinct eigenvalues of  $V$ . By the spectral theorem,  $V$  can be decomposed as  $V = U\Lambda U^\top$ , where the columns of  $U$  consist of orthonormal

eigenvectors of  $V$ , denoted by  $\{u_{11}, \dots, u_{1n_1}, u_{21}, \dots, u_{2n_2}, \dots, u_{N_V 1}, \dots, u_{N_V n_{N_V}}\}$ , where  $n_1, \dots, n_{N_V}$  are the algebraic multiplicity of the eigenvalues respectively. Since  $V$  is a symmetric matrix, the eigenvectors for a basis of  $\mathbb{R}^d$  and we have  $\sum_{i=1}^{N_V} n_i = d$ . We can write  $x$  as a linear combination  $x = \sum_{i=1}^{N_V} \sum_{j=1}^{n_i} w_{ij} u_{ij}$ , where  $\sum_{i=1}^{N_V} \sum_{j=1}^{n_i} w_{ij}^2 = 1$ . Define  $a_i := \sum_{j=1}^{n_i} w_{ij}^2$ , by direct computation, we have  $\sum_{i=1}^{N_V} a_i = 1$  and  $\|x\|_V^2 = \sum_{i=1}^{N_V} \lambda_i a_i$  and  $\|x\|_{V^{-1}}^2 = \sum_{i=1}^{N_V} \lambda_i^{-1} a_i$ .

Now we study the range of  $\|x\|_{V^{-1}}^2$  when  $\|x\|_V^2$  is bounded as  $m \leq \|x\|_V^2 \leq M$ . First, let's focus on maximizing  $\|x\|_{V^{-1}}^2$ , it suffices to solve the LP problem

$$\text{maximize } \sum_{i=1}^{N_V} a_i \lambda_i^{-1} \quad \text{s.t.} \quad \forall i, a_i \geq 0, \sum_{i=1}^{N_V} a_i = 1, \sum_{i=1}^{N_V} a_i \lambda_i \geq m, \sum_{i=1}^{N_V} a_i \lambda_i \leq M.$$

The Lagrangian is given by

$$L = \sum_{i=1}^{N_V} a_i \lambda_i^{-1} + \mu(1 - \sum_{i=1}^{N_V} a_i) + \eta(\sum_{i=1}^{N_V} a_i \lambda_i - m) + \gamma(M - \sum_{i=1}^{N_V} a_i \lambda_i) + \sum_{i=1}^{N_V} \kappa_i a_i.$$

The KKT conditions are given by

$$\begin{cases} \nabla_{a_i} L = \lambda_i^{-1} - \mu + \eta \lambda_i - \gamma \lambda_i + \kappa_i = 0, \forall i, \\ a_i \geq 0, \forall i, \sum_{i=1}^{N_V} a_i = 1, \sum_{i=1}^{N_V} a_i \lambda_i \geq m, \sum_{i=1}^{N_V} a_i \lambda_i \leq M, \\ \eta \geq 0, \gamma \geq 0, \kappa_i \geq 0, \forall i, \\ \eta(\sum_{i=1}^{N_V} a_i \lambda_i - m) = 0, \gamma(M - \sum_{i=1}^{N_V} a_i \lambda_i) = 0, \kappa_i a_i = 0, \forall i. \end{cases} \quad (9)$$

To satisfy the first condition above,  $\kappa_i$ 's can only be zero for at most two indices. Hence,  $a_i$  can only be non-zero for at most two distinct eigenvalues, denoted by  $\lambda_i$  and  $\lambda_j$ , where  $i < j$  and  $\lambda_i > \lambda_j$ . Namely, the solution to equation 9 lies in the subspace spanned by the eigenvectors corresponding to  $\lambda_i$  and  $\lambda_j$ .

Let  $y = \|x\|_V^2$ , we have  $a_i \lambda_i + a_j \lambda_j = y$  and  $a_i \lambda_i^{-1} + a_j \lambda_j^{-1} = \|x\|_{V^{-1}}^2$ . Note that  $\sum_{i=1}^{N_V} a_i = a_i + a_j = 1$ , by direct computation, the closed form of  $\|x\|_{V^{-1}}^2$  is given by  $\|x\|_{V^{-1}}^2 = \frac{1}{\lambda_i} + \frac{1}{\lambda_j} - \frac{y}{\lambda_i \lambda_j} =: f(y, \lambda_i, \lambda_j)$ .

Clearly, we have

$$\begin{cases} \frac{\partial f}{\partial y} = -\frac{1}{\lambda_i \lambda_j} < 0, \\ \frac{\partial f}{\partial \lambda_i} = (\frac{y}{\lambda_j} - 1) \frac{1}{\lambda_i^2} > 0, \\ \frac{\partial f}{\partial \lambda_j} = (\frac{y}{\lambda_i} - 1) \frac{1}{\lambda_j^2} < 0. \end{cases}$$

Then the maximum of  $\|x\|_{V^{-1}}^2$  is obtained when  $\lambda_i = \lambda_1$ ,  $\lambda_j = \lambda_{N_V}$ ,  $y = m$ . Therefore, the solution to the LP problem is any unit vector  $x_{\max}^*$  that lies in the subspace spanned by the eigenvectors corresponding to  $\lambda_1$  and  $\lambda_{N_V}$ . Moreover, we have

$$\|x_{\max}^*\|_{V^{-1}}^2 = \frac{1}{\lambda_1} + \frac{1}{\lambda_{N_V}} - \frac{m}{\lambda_1 \lambda_{N_V}}.$$

Similarly, by investigating the KKT conditions for the LP problem that minimize  $\sum_{i=1}^{N_V} a_i \lambda_i^{-1}$ , the minimum of  $\|x\|_{V^{-1}}^2$  is obtained when  $\lambda_i = \lambda_k$ ,  $\lambda_j = \lambda_{k+1}$ ,  $y = M$ , where  $k$  is such that  $\lambda_k = \max_{i \in [N_V]} \{\lambda_i \geq M\}$ , and hence  $\lambda_{k+1} = \min_{i \in [N_V]} \{\lambda_i < M\}$ . The solution vector is any unit vector  $x_{\min}^*$  that lies in the subspace spanned by the eigenvectors corresponding to  $\lambda_k$  and  $\lambda_{k+1}$ , and we have

$$\|x_{\min}^*\|_{V^{-1}}^2 = \frac{1}{\lambda_k} + \frac{1}{\lambda_{k+1}} - \frac{M}{\lambda_k \lambda_{k+1}}.$$

This concludes the proof.  $\square$

## C OTHER PROOFS

### C.1 PROOF OF PROPOSITION 3

*Proof.* By Propostion 1, we have

$$\begin{aligned}\mathbb{P}[\hat{\mathcal{A}}_T] &= \mathbb{P}\left[\cap_{t=1}^T \left\{\|\hat{\theta}_t - \theta_t^*\|_{V_t} \geq \beta_{t,\delta',\lambda_{\text{reg}}}^{RLS}\right\}\right] \\ &\geq 1 - \sum_{t=1}^T \mathbb{P}\left[\|\hat{\theta}_t - \theta_t^*\|_{V_t} \geq \beta_{t,\delta',\lambda_{\text{reg}}}^{RLS}\right] \\ &\geq 1 - \frac{\delta}{2}.\end{aligned}$$

Similarly, by Definition 2, we have

$$\begin{aligned}\mathbb{P}[\tilde{\mathcal{A}}_T] &= \mathbb{P}\left[\cap_{t=1}^T \left\{\tilde{\theta}_t \notin \mathcal{E}_t^{PVT}(\delta') | \mathcal{F}_t\right\}\right] \\ &\geq 1 - \sum_{t=1}^T \mathbb{P}\left[\tilde{\theta}_t \notin \mathcal{E}_t^{PVT}(\delta') | \mathcal{F}_t\right] \\ &\geq 1 - \frac{\delta}{2}.\end{aligned}$$

Combining the two inequalities above, we have  $\mathbb{P}[\mathcal{A}_T] \geq 1 - \delta$ .  $\square$

### C.2 PROOF OF PROPOSITION 4

*Proof.* Since  $\theta^* \in \mathcal{E}_t^{RLS}(\delta')$  and  $\tilde{\theta}_t \in \mathcal{E}_t^{PVT}(\delta')$ , it holds that

$$\|\theta^* - \hat{\theta}_t\|_{V_t} \leq \beta_{t,\delta',\lambda_{\text{reg}}}^{RLS}, \quad \|\tilde{\theta}_t - \hat{\theta}_t\|_{V_t} \leq \beta_t^{PVT}(\delta') = \iota_t \beta_{t,\delta',\lambda_{\text{reg}}}^{RLS}. \quad (10)$$

In the following, we drop the dependence on  $\delta'$  and  $\lambda_{\text{reg}}$  for notation simplicity. We have

$$\begin{aligned}\langle x_t^*, \theta^* \rangle - \langle \tilde{x}_t, \theta^* \rangle &= \left(\langle x_t^*, \theta^* \rangle - \langle x_t^*, \tilde{\theta}_t \rangle\right) + \left(\langle x_t^*, \tilde{\theta}_t \rangle - \langle \tilde{x}_t, \tilde{\theta}_t \rangle\right) \\ &\quad + \left(\langle \tilde{x}_t, \tilde{\theta}_t \rangle - \langle \tilde{x}_t, \hat{\theta}_t \rangle\right) + \left(\langle \tilde{x}_t, \hat{\theta}_t \rangle - \langle \tilde{x}_t, \theta^* \rangle\right).\end{aligned}$$

To bound the second term on the right hand side, recall by Equation equation 3 the POFUL action  $\tilde{x}_t$  satisfies

$$\langle x_t^*, \tilde{\theta}_t \rangle + \tau_t \|x_t^*\|_{V_t^{-1}} \beta_t^{RLS} \leq \langle \tilde{x}_t, \tilde{\theta}_t \rangle + \tau_t \|\tilde{x}_t\|_{V_t^{-1}} \beta_t^{RLS}.$$

Rearranging the ineuqlity, we obtain  $\langle x_t^*, \tilde{\theta}_t \rangle - \langle \tilde{x}_t, \tilde{\theta}_t \rangle \leq \tau_t \|\tilde{x}_t\|_{V_t^{-1}} \beta_t^{RLS} - \tau_t \|x_t^*\|_{V_t^{-1}} \beta_t^{RLS}$ .

The other three terms are bounded similarly using the Cauchy-Schwarz inequality, the triangle ineuqlity of the  $V_t^{-1}$ -norm, and the concentration condition equation 10. As a result, we have

$$\begin{aligned}\langle x_t^*, \theta^* \rangle - \langle x_t^*, \tilde{\theta}_t \rangle &\leq (1 + \iota_t) \|x_t^*\|_{V_t^{-1}} \beta_t^{RLS}, \\ \langle \tilde{x}_t, \tilde{\theta}_t \rangle - \langle \tilde{x}_t, \hat{\theta}_t \rangle &\leq \iota_t \|\tilde{x}_t\|_{V_t^{-1}} \beta_t^{RLS}, \\ \langle \tilde{x}_t, \hat{\theta}_t \rangle - \langle \tilde{x}_t, \theta^* \rangle &\leq \|\tilde{x}_t\|_{V_t^{-1}} \beta_t^{RLS}.\end{aligned}$$

Combing all terms above, we have

$$\langle x_t^*, \theta^* \rangle - \langle \tilde{x}_t, \theta^* \rangle \leq (1 + \iota_t - \tau_t) \|x_t^*\|_{V_t^{-1}} \beta_t^{RLS} + (1 + \iota_t + \tau_t) \|\tilde{x}_t\|_{V_t^{-1}} \beta_t^{RLS}.$$

$\square$

### C.3 PROOF OF THEOREM 1

*Proof.* We formally prove Theorem 1 for completeness. The proof techniques are developed in previous papers (Abbasi-Yadkori et al., 2011; Agrawal & Goyal, 2013; Abeille et al., 2017).

Throughout the proof, we condition on the event  $\mathcal{A}_T$ , which holds with probability  $1 - \delta$  by Proposition 3. Applying Proposition 4, we obtain

$$\begin{aligned} \mathcal{R}(T) &\leq \sum_{t=1}^T (\langle x_t^*, \theta^* \rangle - \langle \tilde{x}_t, \theta^* \rangle) \mathbb{I}\{\mathcal{A}_t\} \\ &\leq \sum_{t=1}^T (1 + \iota_t - \tau_t) \|x_t^*\|_{V_t^{-1}} \beta_{t, \delta', \lambda_{\text{reg}}}^{RLS} + (1 + \iota_t + \tau_t) \|\tilde{x}_t\|_{V_t^{-1}} \beta_{t, \delta', \lambda_{\text{reg}}}^{RLS}. \end{aligned}$$

Recall  $\|x_t^*\|_{V_t^{-1}} = \alpha_t \|\tilde{x}_t\|_{V_t^{-1}}$  and  $\mu_t = \alpha_t(1 + \iota_t - \tau_t) + 1 + \iota_t + \tau_t$ , we have

$$\mathcal{R}(T) \leq \sum_{t=1}^T \mu_t \|\tilde{x}_t\|_{V_t^{-1}} \beta_{t, \delta', \lambda_{\text{reg}}}^{RLS}.$$

Applying the Cauchy-Schwarz inequality and Proposition 2, note that  $\max_{t \in [T]} \beta_{t, \delta', \lambda_{\text{reg}}}^{RLS} = \beta_{T, \delta', \lambda_{\text{reg}}}^{RLS}$ , we obtain

$$\mathcal{R}(T) \leq \sqrt{\sum_{t=1}^T \|\tilde{x}_t\|_{V_t^{-1}}^2} \sqrt{\sum_{t=1}^T \mu_t^2 \left( \beta_{t, \delta', \lambda_{\text{reg}}}^{RLS} \right)^2} \leq \sqrt{2d \log \left( 1 + \frac{T}{\lambda} \right)} \sqrt{\sum_{t=1}^T \mu_t^2 \beta_{t, \delta', \lambda_{\text{reg}}}^{RLS}}.$$

This concludes the proof.  $\square$

## D REGRET DECOMPOSITION OF POFUL

To discuss the relationship between our method and those based on optimism (Abbasi-Yadkori et al., 2011; Agrawal & Goyal, 2013; Abeille et al., 2017), we decompose the regret of POFUL into three terms, and sketch how they are bounded separately.

Let  $x_t^* = \arg \max_{x \in \mathcal{X}_t} \langle x, \theta^* \rangle$  be the optimal action and  $\tilde{x}_t$  be the action chosen by POFUL, the regret decomposes as

$$\begin{aligned} \mathcal{R}(T) &= \sum_{t=1}^T \langle x_t^*, \theta^* \rangle - \langle \tilde{x}_t, \theta^* \rangle \\ &= \underbrace{\sum_{t=1}^T \langle x_t^*, \theta^* \rangle - \langle \tilde{x}_t, \hat{\theta}_t \rangle}_{\mathcal{R}^{PE}(T)} + \underbrace{\sum_{t=1}^T \langle \tilde{x}_t, \hat{\theta}_t \rangle - \langle \tilde{x}_t, \tilde{\theta}_t \rangle}_{\mathcal{R}^{PVT}(T)} + \underbrace{\sum_{t=1}^T \langle \tilde{x}_t, \tilde{\theta}_t \rangle - \langle \tilde{x}_t, \theta^* \rangle}_{\mathcal{R}^{RLS}(T)}. \end{aligned}$$

$\mathcal{R}^{RLS}(T)$  is the regret due to the estimation error of the RLS estimator. Note that  $\tilde{x}_t$ 's are the action sequence used to construct the RLS estimate. By Proposition 2 their cumulative  $V_t^{-1}$ -norm is bounded by  $2d \log(1 + t/\lambda_{\text{reg}})$ . Hence, the upper bound of  $\mathcal{R}^{RLS}(T)$  is essentially determined by the  $V_t$ -distance between  $\hat{\theta}_t$  and  $\theta^*$ , which, via the Cauchy-Schwarz inequality, is characterized by the radius of the confidence ellipsoid  $\mathcal{E}_t^{RLS}$ .  $\mathcal{R}^{PVT}(T)$  corresponds to the regret due to the exploration of POFUL by choosing the pivot parameter  $\tilde{\theta}_t$  rather than using  $\hat{\theta}_t$  as OFUL would. Similar to  $\mathcal{R}^{RLS}(T)$ , the upperbound for this term is related to the  $V_t$ -distance between  $\tilde{\theta}_t$  and  $\hat{\theta}_t$ , which is controlled by construction and depends on the inflation parameter  $\iota_t$ . As a result, it can be shown that  $\mathcal{R}^{RLS}(T) = \tilde{\mathcal{O}}(d\sqrt{T})$  and  $\mathcal{R}^{PVT}(T) = \tilde{\mathcal{O}}(d(\sum_{t=1}^T \iota_t^2)^{1/2})$  with probability  $1 - \delta$ . Notably,  $\mathcal{R}^{RLS}(T) = \tilde{\mathcal{O}}(d\sqrt{T})$ , matching the known minimax lowerbound. For  $\mathcal{R}^{PVT}(T)$  to match this lower bound as



well, one way is to set  $\iota_t = \tilde{\mathcal{O}}(1)$  for all  $t \in [T]$ . However, it is known that, see for example (Agrawal & Goyal, 2013; Abeille et al., 2017; Hamidi & Bayati, 2020a), such selection could be problematic for bounding  $\mathcal{R}^{PE}(T)$ .

$\mathcal{R}^{PE}(T)$  corresponds to the *pessimism* term. In the Bayesian analysis of LinTS, the expectation of this term is 0, with respect to  $\theta^*$ , as long as  $\tilde{\theta}_t$  and  $\theta^*$  are sampled from the same distribution, which occurs when LinTS has access to the true prior distribution for  $\theta^*$ . In the frequentist analysis, however, we need to control the pessimism term incurred by any random sample  $\tilde{\theta}_t$ .

For OFUL, this term is bounded properly with high probability by the optimistic selection of OFUL actions<sup>1</sup>. For LinTS, the only known analysis due to Agrawal & Goyal (2013) and Abeille et al. (2017) gives a bound of order  $\tilde{\mathcal{O}}(d\sqrt{dT})$  using an optimism-based approach, which is worse than the Bayesian regret by a factor of  $\sqrt{d}$ . The key component of their proof is introducing inflation to the posterior variance by setting  $\iota_t = \tilde{\mathcal{O}}(\sqrt{d})$  to enforce exploration. For example, Abeille et al. (2017) demonstrate that by using inflation, LinTS samples optimistic  $\tilde{\theta}_t$  with a probability greater than a constant, which means that the inequality  $\langle x_t^*, \theta^* \rangle \leq \langle \tilde{x}_t, \tilde{\theta}_t \rangle$  holds with a constant probability.

For Greedy, there is no general theoretical guarantee for bounding the pessimism term without imposing additional structural assumptions. Our approach to tackle this challenge distinguishes us from methods based on optimism (Agrawal & Goyal, 2013; Abeille et al., 2017). Interestingly, Abeille et al. (2017) conjectured that non-optimistic samples may provide beneficial exploration and help control the growth of regret.

By relaxing the requirement for optimistic samples, we avoid inflating the posterior, which in turn prevents a  $\sqrt{d}$ -gap in the regret. Instead, we introduce a measure of the “quality” of POFUL actions with respect to the regret and develop a computable upper bound for this quality using geometric information in the data. This approach yields a data-driven regret bound for POFUL that matches the minimax optimal regret in some settings. Furthermore, it allows for the construction of variants of LinTS and Greedy with a provable frequentist regret bound that is minimax optimal up to only a constant factor.

## E DISCRETE ACTION SPACE

This section introduces the method for establishing an upper bound on  $\alpha_t$  in the context of discrete action spaces. It turns out that the process involves comparing confidence interval lengths across all potentially optimal actions.

To see this, recall for an arbitrary action  $x \in \mathcal{X}_t$ , by Proposition 1, with high probability its expected reward is bounded as

$$L_t(x) := \langle x, \hat{\theta}_t \rangle - \iota_t \|x\|_{V_t^{-1} \beta_{t, \delta', \lambda_{\text{reg}}}^{RLS}} \leq \langle x, \theta^* \rangle \leq \langle x, \hat{\theta}_t \rangle + \iota_t \|x\|_{V_t^{-1} \beta_{t, \delta', \lambda_{\text{reg}}}^{RLS}} =: U_t(x).$$

The confidence interval length is proportional to  $\|x\|_{V_t^{-1}}$ . Therefore, to characterize the range of  $\|x_t^*\|_{V_t^{-1}}$ , we only need to identify the set of potentially optimal actions and calculate the minimal  $V_t^{-1}$ -norm among all actions in that set.

Note that for an action  $x \in \mathcal{X}_t$  to remain potentially optimal, it cannot be dominated by another action. I.e., we require  $U_t(x) \geq \max_{y \in \mathcal{X}_t} L_t(y)$ . Therefore, define

$$\mathcal{C}_t(\beta) := \{x \in \mathcal{X}_t : \langle x, \hat{\theta}_t \rangle + \|x\|_{V_t^{-1} \beta} \geq \max_{y \in \mathcal{X}_t} \langle y, \hat{\theta}_t \rangle - \|y\|_{V_t^{-1} \beta}\},$$

the set of potentially optimal actions is given by  $\mathcal{C}_t(\beta_{t, \delta', \lambda_{\text{reg}}}^{RLS})$ . Similarly, the set of actions that might be chosen by POFUL is given by  $\mathcal{C}_t(\beta_{t, \delta', \lambda_{\text{reg}}}^{PVT})$ , where we let  $\beta_t^{PVT} := \iota_t \beta_t^{RLS}$ . The inflation parameter  $\iota_t$  turns out to control the conservativeness when eliminating actions.

<sup>1</sup>The term is further split into two parts as shown in the first few lines of proof of Proposition 4 in Appendix C.2, with one term bounded by the optimism and the other term controlled by the  $V_t$  distance between  $\theta^*$  and  $\tilde{\theta}_t$ .

By comparing the range of  $V_t^{-1}$ -norm for both sets, an upper bound  $\hat{\alpha}_t$  for the uncertainty ratio  $\alpha_t$  is given by

$$\hat{\alpha}_t := \frac{\sup_{x \in \mathcal{C}_t(\beta_{t,\delta',\lambda_{\text{reg}}}^{RLS})} \|x\|_{V_t^{-1}}}{\inf_{x \in \mathcal{C}_t(\beta_{t,\delta',\lambda_{\text{reg}}}^{PVT})} \|x\|_{V_t^{-1}}}. \quad (11)$$

## F DETAILS OF SYNTHETIC ENVIRONMENTS

**Example 1. Stochastic linear bandit with uniformly and independently distributed actions.** We fix  $d = 50$ , and sample  $\theta^* \sim \text{Unif}(\{\theta \in \mathbb{R}^d \mid \|\theta\| = 10\})$  on a sphere with fixed norm. At each time  $t$ , we generate 100 i.i.d. random actions sampled from  $\text{Unif}(\mathcal{S}_{d-1})$  to form  $\mathcal{X}_t$ . This is a basic example of standard stochastic linear bandit problems without any extra structure. We set the threshold  $\mu = 8$  for TS-MR and Greedy-MR. We average simulation results over 100 independent runs.

**Example 2. Contextual bandits embedded in the linear bandit problem (Abbasi-Yadkori, 2013).** We fix  $d = 50$ , and sample  $\theta^* \sim \text{Unif}(\{\theta \in \mathbb{R}^d \mid \|\theta\| = 70\})$ . At each time  $t$ , we first generate a random vector  $u_t \sim \mathcal{N}(0, \mathbb{I}_5)$  and let  $x_{t,i} \in \mathbb{R}^{50}$  be the vector whose  $i$ -th block of size 5 is a copy of  $u_t$ , and other components are 0. Then  $X_t = \{x_{t,i}\}_{i \in [10]}$  is an action set of size 10, sharing the same feature  $u_t$  in different blocks. This problem is equivalent to a 10-armed contextual bandit. We set  $\mu = 12$  for TS-MR and Greedy-MR. Again, we average simulation results over 100 independent runs.

**Example 3. Prior mean mismatch (Hamidi & Bayati, 2020a).** This is an example in which LinTS is shown to incur linear Bayesian regret. We sample  $\theta^* \sim \mathcal{N}(m\mathbf{1}_{3d}, \mathbb{I}_{3d})$  and fix the action set  $\mathcal{X}_t = \{0, x_a, x_b\}$  for all  $t \in [T]$ , where  $x_a = -\sum_{i=1}^d \frac{e_i}{\sqrt{3d}}$ ,  $x_b = \sum_{i=11}^{3d} \frac{e_i}{\sqrt{3d}} - \sum_{i=1}^d \frac{e_i}{\sqrt{3d}}$ . It is shown in Hamidi & Bayati (2020a) that, when LinTS takes a wrong prior mean as input, it has a large probability to choose  $\tilde{x}_2 = 0$ , conditioned on  $\tilde{x}_1 = x_a$ . Note that choosing the zero action brings no information update to LinTS, it suffers a linear Bayesian regret when trying to escape from the zero action. We let  $m = 10$  and set  $d = 10$ , so the problem is a 30-dimensional linear bandit. We set  $\mu = 12$  for TS-MR and Greedy-MR. We carried out 100 independent runs.

## G EXAMPLE CASES AND EMPIRICAL VALIDATIONS OF THEOREM 2

To better understand what Theorem 2 implies, we discuss some special cases in this section.

**Case 1: a pure exploration regime.** When the decision-maker doesn't care about the regret and adopts a pure exploration algorithm that plays actions in all directions sequentially, we expect  $\lambda_i(V_t) = \mathcal{O}(t)$  for all  $i = 1, \dots, d$ . Then  $\hat{\alpha}_t \leq C$  for some constant  $C > 0$ . Specifically, if  $V_t = D\mathbb{I}_d$  for some constant  $D > 0$ , we have  $\|x\|_{V_t^{-1}} = D^{-1}\|x\| = D^{-1}$  for all  $x \in \mathcal{S}_{d-1}$  and hence  $\hat{\alpha}_t = 1$ .

**Case 2: linear structures.** When the reward takes a linear form in the action, for example, the stochastic linear bandits we study, it's observed in practice that the estimate  $\hat{\theta}_t$  tends to align in the first eigenspace of the uncertainty structure  $V_t$  (empirically validated below). To see this, note that in order to maximize the reward in an online manner, bandit algorithms tend to select actions towards the confidence ellipsoid centered at  $\hat{\theta}_t$ , hence forcing more exploration along the direction of  $\hat{\theta}_t$ , especially at the late stage of the algorithm when the ellipsoid is small. The following proposition states that, as long as the center  $\hat{\theta}_t$  of the confidence ellipsoid  $\mathcal{E}_t$  tends to be aligned with the first eigenspace of  $V_t$ , the corresponding uncertainty ratio tends to 1, indicating a regret bound matching the minimax  $\tilde{O}(d\sqrt{T})$  rate by Theorem 1. This provides a plausible explanation for the empirical success of LinTS and Greedy.

**Proposition 5.** Suppose  $\lim_{t \rightarrow \infty} \frac{\|\hat{\theta}_t\|_{V_t}^2}{\|\hat{\theta}_t\|^2} = \lambda_1(V_t)$ , it holds that  $\lim_{t \rightarrow \infty} \hat{\alpha}_t = 1$ .

*Proof.* This corresponds to the case where  $m, M \rightarrow \lambda_1(V_t)$  in Lemma 3. Without loss of generality, we let  $M > \lambda_2(V_t)$ . Then  $\hat{\alpha}_t = (\lambda_1^{-1}(V_t) + \lambda_d^{-1}(V_t) - m\lambda_1^{-1}(V_t)\lambda_d^{-1}(V_t))/(\lambda_k^{-1}(V_t) + \lambda_{k+1}^{-1}(V_t) - M\lambda_k^{-1}(V_t)\lambda_{k+1}^{-1}(V_t)) \rightarrow \lambda_1^{-1}(V_t)/\lambda_1^{-1}(V_t) = 1$ .  $\square$

To empirically confirm that Case 2 is not merely theoretical, we examine the condition outlined in Proposition 5. Our focus is on the ratio  $\zeta_t := \frac{\|\hat{\theta}_t\|_{V_t}^2/\|\hat{\theta}_t\|^2}{\lambda_1(V_t)}$ . Notably,  $\|\hat{\theta}_t\|_{V_t}^2$  tends to approximate  $\lambda_1\|\hat{\theta}_t\|^2$  when  $\hat{\theta}_t$  is proximate to the top eigenspace of  $V_t$ . Consequently, this ratio serves as a proxy of the alignment of  $\hat{\theta}_t$  with the top eigenspace of  $V_t$ . Specifically, a  $\zeta_t$  value of 1 signifies that  $\hat{\theta}_t$  is within the top eigenspace.

We resort to Example 1 from Section 7, which epitomizes the general linear bandit problem in its standard form. The empirical sequence  $\zeta_t$  is depicted in Figure 6.

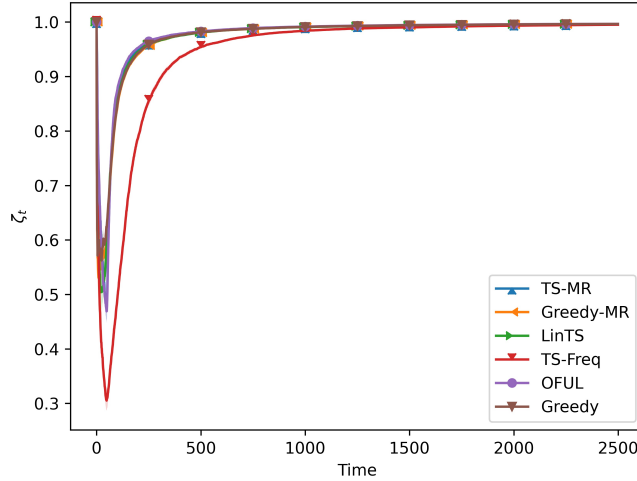

Figure 6: Evolution of the alignment proxy  $\zeta_t$  in Example 1.

Figure 6 reveals that for every bandit algorithm, the value of  $\zeta_t$  is notably high (exceeding 0.9) at the early stages of implementation and gradually converges towards 1. This observation validates the behavior outlined in Case 2. Furthermore, the consistency of this phenomenon across all examined bandit algorithms suggests that such a tendency is likely a characteristic of the online nature of these algorithms.

It is important to note that the initial sharp decline observed is attributed to the behavior of the regularized least squares estimator in over-parameterized scenarios, when  $t$  is less than the dimension  $d$ .

## H TS-MR AND GREEDY-MR ALGORITHMS

---

### Algorithm 2 TS-MR (Greedy-MR)

---

**Require:**  $T, \delta, \{\iota_t\}_{t \in [T]}, \mu$   
Initialize  $V_0 \leftarrow \lambda \mathbb{I}, \hat{\theta}_1 \leftarrow 0, \delta' \leftarrow \delta/2T$   
**for**  $t = 1, 2, \dots, T$  **do**  
  Calculate  $\hat{\alpha}_t$  using Theorem 2  
   $\hat{\mu}_t \leftarrow \hat{\alpha}_t(1 + \iota_t) + 1 + \iota_t$   
  **if**  $\hat{\mu}_t \leq \mu$  **then**  
    Sample  $\eta_t \sim \mathcal{D}^{SA}(\delta')$  (defined in Section 3)  
     $\tilde{\theta}_t \leftarrow \hat{\theta}_t + \iota_t \beta_{t, \delta', \lambda_{\text{reg}}}^{RLS} V_t^{-\frac{1}{2}} \eta_t$   
     $x_t \leftarrow \arg \max_{x \in \mathcal{X}_t} \langle x, \tilde{\theta}_t \rangle$   
  **else**  
     $x_t \leftarrow \arg \max_{x \in \mathcal{X}_t} \arg \max_{\theta \in \mathcal{E}_t^{RLS}(\delta')} \langle x, \tilde{\theta}_t \rangle$   
  **end if**  
  Observe reward  $r_t$   
   $V_{t+1} \leftarrow V_t + x_t x_t^\top$   
   $\hat{\theta}_{t+1} \leftarrow V_{t+1}^{-1} \sum_{s=1}^t x_s r_s$ .  
**end for**

---

## I FRACTION OF OFUL ACTIONS

In this section, we show the fraction of OFUL actions used in Greedy-MR and TS-MR in all experiments. Notably, the results show that OFUL actions are only frequently used at certain beginning stage of the time horizon. This indicates that:

- The proposed Greedy-MR and TS-MR algorithms only implement OFUL actions when necessary, and the fraction of OFUL remains low in most of the time horizon. Hence, the computational cost remains relatively low.
- Limited amount of course-corrected exploration at the beginning efficiently fixed TS and Greedy in the problematic instances.

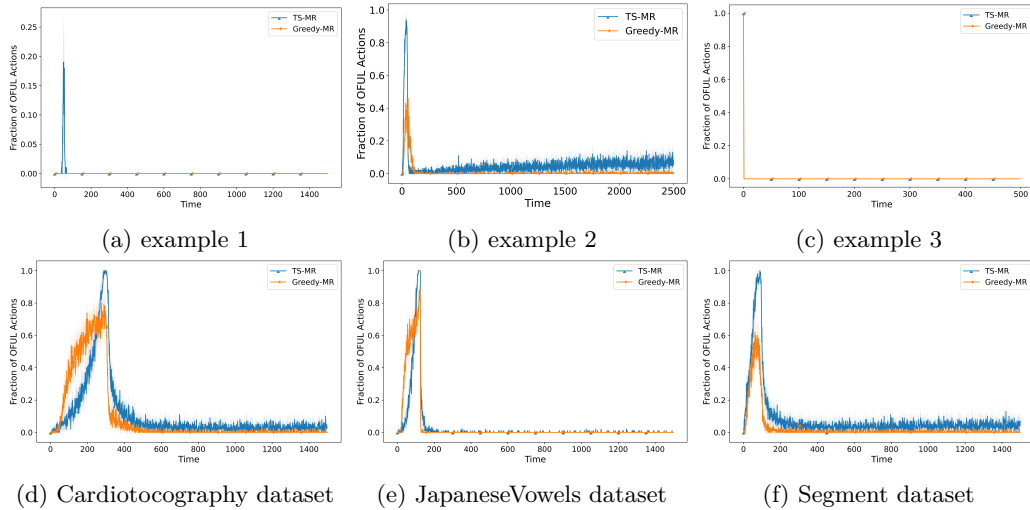

Figure 7: Fraction of OFUL actions of TS-MR and Greedy-MR on synthetic and real-world data.

## J INFLUENCE OF $\mu$

In this section, we investigate the influence of  $\mu$  and discuss how to choose it. We vary the value of  $\mu$  and conduct simulations on Example 2 and the Segment dataset as done in Section 7. The former represents a scenario where course-correction is necessary (otherwise LinTS fails), while the latter represents a practical scenario where course-correction is unnecessary. The results are shown in Figures 8 and 9.

We have the following observations on the influence of  $\mu$ :

- In general, as  $\mu$  increases, the fraction of OFUL actions decreases. For a sufficiently small  $\mu$ , the algorithms become OFUL (e.g., TS-MR in Figures 8a and 9a). For a large  $\mu$ , the algorithms are similar to the original algorithms (e.g., TS-MR and Greedy-MR in Figures 8c and 9c).
- By optimizing the choice of  $\mu$ , the performance of the corrected algorithm might outperform both OFUL and the base algorithm (e.g., Greedy-MR in Figures 8b and 9b). This demonstrates that TS/Greedy-MR are not merely naive interpolations between TS/Greedy and OFUL, and that proper exploration in the initial stage benefits the long-term performance of the algorithms.
- As long as  $\mu$  isn't too small, the performance of the course-corrected algorithm remains relatively robust to the choice of  $\mu$ . The simulations show  $\mu \in [8, 12]$  is a good initial choice.

**Tuning  $\mu$ .** In practice, we recommend setting  $\mu$  to a moderate value, typically within the range  $[8, 12]$ , as validated by our simulation results. The selection of  $\mu$  should be guided by heuristics that ensure an appropriate proportion of course-corrected exploration during the initial stage. A suitable  $\mu$  value is indicated when the fraction of OFUL actions is high at the beginning and gradually decreases to and maintains a low level. If the fraction of OFUL actions remains consistently high, increasing  $\mu$  can help reduce computational costs. Conversely, if very few OFUL actions are executed during the initial stage, decreasing  $\mu$  may be beneficial. Finally, we note that since algorithmic performance remains robust across moderate values of  $\mu$ , the precise selection of  $\mu$  is unlikely to be a significant practical concern.

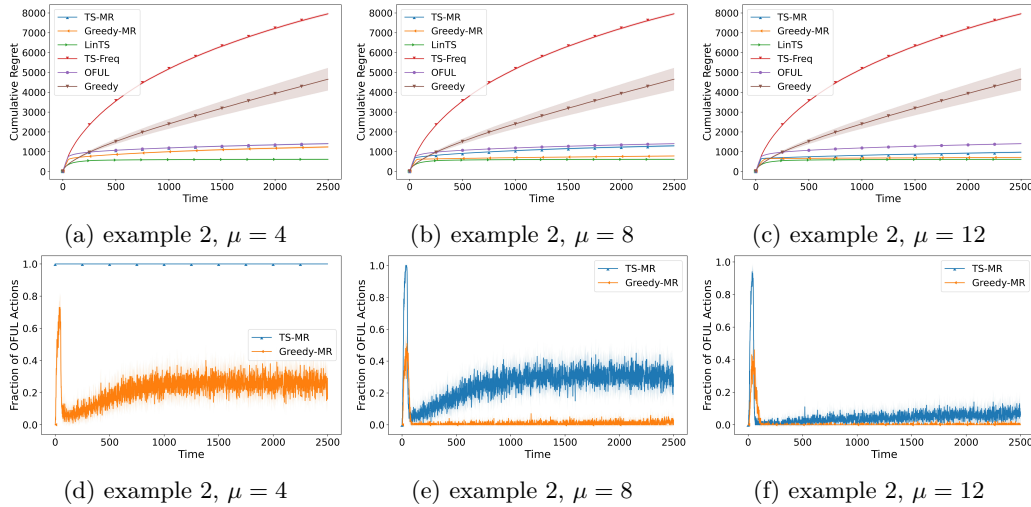

Figure 8: Cumulative regret and fraction of OFUL actions of TS-MR and Greedy-MR on example 2.

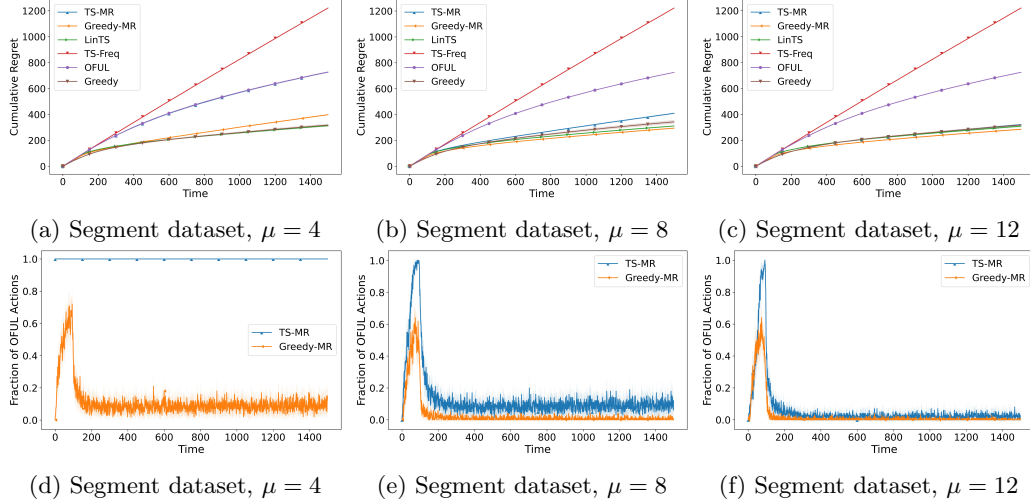

Figure 9: Cumulative regret and fraction of OFUL actions of TS-MR and Greedy-MR on Segment datasets.
